# Supplementary material for: Four noncentrosymmetric molybdophosphates discovered by a chemical substitution strategy
Source: Royal Society of Chemistry journal article supplement (doi:10.1039/d4dt03580a), 2025-01-01
Supplement: d4dt03580a1.pdf [file d4dt03580a1.pdf]

**Electronic Supplementary Information**  
**Four Noncentrosymmetric Molybdophosphates Discovered by Chemical**  
**Substitution Strategy**

Zhixia Gao,<sup>a, b</sup> Ke Li,<sup>a</sup> Hong Du,<sup>\*b, c</sup> and Tuohetijiang Baiheti<sup>\*a</sup>

<sup>a</sup>Research Center for Crystal Materials; Xinjiang Key Laboratory of Functional Crystal Materials; Xinjiang Technical Institute of Physics and Chemistry, Chinese Academy of Sciences, 40-1 South Beijing Road, Urumqi 830011, China.

<sup>b</sup>College of Chemistry and Chemical Engineering, Xinjiang Normal University, Urumqi, 830054, P. R. China.

<sup>c</sup>Xinjiang Key Laboratory of Energy Storage and Photoelectrocatalytic Materials, Urumqi, 830054, China.

\*Corresponding authors, \*E-mails: 2629841619@qq.com., 175790509@qq.com

## Table of Contents

| Title                                                                                                                                                                        | Page |
|------------------------------------------------------------------------------------------------------------------------------------------------------------------------------|------|
| Experimental Section                                                                                                                                                         | S3   |
| <b>Table S1.</b> Atomic coordinates, equivalent isotropic displacement parameter and bond valence sum for $A_xB_{4-x}Mo_5P_2O_{22}$ ( $A = Na, K, B = Rb, Cs$ ).             | S5   |
| <b>Table S2.</b> Bond lengths [ $\text{\AA}$ ] and angles [ $^\circ$ ] for $KCs_3Mo_5P_2O_{22}$ .                                                                            | S8   |
| <b>Table S3.</b> Bond lengths [ $\text{\AA}$ ] and angles [ $^\circ$ ] for $K_4Mo_5P_2O_{22}$ .                                                                              | S11  |
| <b>Table S4.</b> Bond lengths [ $\text{\AA}$ ] and angles [ $^\circ$ ] for $K_2Rb_2Mo_5P_2O_{22}$ .                                                                          | S14  |
| <b>Table S5.</b> Bond lengths [ $\text{\AA}$ ] and angles [ $^\circ$ ] for $NaRb_3Mo_5P_2O_{22}$ .                                                                           | S17  |
| <b>Table S6.</b> Dipole moments of $MoO_6$ , and $PO_4$ polyhedra in $K_4Mo_5P_2O_{22}$ , $Rb_4Mo_5P_2O_{22}$ , and $Cs_4Mo_5P_2O_{22}$ .                                    | S20  |
| <b>Figure S1.</b> TG-DSC curves of $A_xB_{4-x}Mo_5P_2O_{22}$ ( $A = Na, K, B = Rb, Cs$ ).                                                                                    | S21  |
| <b>Figure S2.</b> XRD patterns of $A_xB_{4-x}Mo_5P_2O_{22}$ ( $A = Na, K, B = Rb, Cs$ ).                                                                                     | S22  |
| <b>Figure S3.</b> IR data of $A_xB_{4-x}Mo_5P_2O_{22}$ ( $A = Na, K, B = Rb, Cs$ ).                                                                                          | S23  |
| <b>Figure S4.</b> UV-Vis-NIR diffuse-reflectance spectra of (a) $K_4Mo_5P_2O_{22}$ , (b) $K_2Rb_2Mo_5P_2O_{22}$ , (c) $KCs_3Mo_5P_2O_{22}$ , and (d) $NaRb_3Mo_5P_2O_{22}$ . | S24  |
| <b>Figure S5.</b> Oscilloscope traces of the SHG signals for the powders for KDP, $K_4Mo_5P_2O_{22}$ (a), and (b) $KCs_3Mo_5P_2O_{22}$ .                                     | S25  |
| <b>Figure S6.</b> Dipole moment directions of the $PO_4$ and $MoO_6$ polyhedra in $KCs_3Mo_5P_2O_{22}$ , $K_4Mo_5P_2O_{22}$ , and $Cs_4Mo_5P_2O_{22}$ .                      | S26  |
| <b>Figure S7.</b> The SHG density maps of the VE occupied (left) and VE unoccupied orbitals (right) of $K_4Mo_5P_2O_{22}$ (a-b), $NaRb_3Mo_5P_2O_{22}$ (c-d).                | S27  |
| <b>Figure S8.</b> Calculated band structures of the GGA method, (a) $K_4Mo_5P_2O_{22}$ , (b) $KCs_3Mo_5P_2O_{22}$ , and (c) $NaRb_3Mo_5P_2O_{22}$ .                          | S28  |

## Experimental Section

### Compound Synthesis.

Reagents:  $\text{Na}_2\text{CO}_3$  (99.9 %),  $\text{K}_2\text{CO}_3$  (99.0 %),  $\text{Rb}_2\text{CO}_3$  (99.0 %),  $\text{Cs}_2\text{CO}_3$  (99.0 %),  $\text{MoO}_3$  (99.0 %),  $\text{NH}_4\text{H}_2\text{PO}_4$  (99.0 %) from Aladdin Chemical Industry Co., Ltd. were used as received from commercial sources without any further purification.

The single crystals of  $\text{A}_x\text{B}_{4-x}\text{Mo}_5\text{P}_2\text{O}_{22}$  ( $\text{A} = \text{Na}, \text{K}, \text{B} = \text{Rb}, \text{Cs}$ ) were obtained through spontaneous crystallization. The stoichiometric reagents of  $(\text{A}/\text{B})_2\text{CO}_3$ , ( $\text{A} = \text{Na}, \text{K}, \text{B} = \text{Rb}, \text{Cs}$ ),  $\text{MoO}_3$ , and  $\text{NH}_4\text{H}_2\text{PO}_4$  were mixed thoroughly and placed in platinum crucibles, which were further placed in vertical, programmable temperature furnaces. The mixtures were heated to  $780\text{ }^\circ\text{C}$ , held at this temperature for 12 h, and then slowly cooled down to  $400\text{ }^\circ\text{C}$  at a rate of  $3\text{ }^\circ\text{C}\cdot\text{h}^{-1}$ , followed by rapid cooling to room temperature. The crystals were separated mechanically from the crucible, and polycrystalline powder was obtained by grinding single crystals from spontaneous crystallization for performance characterization.

### Single Crystal X-ray Diffraction.

Selected high-quality single crystals with a suitable size were used for structural characterization. The selected single crystals were stuck to a glass fiber separately to collect the crystal structure data by a Bruker D8 Venture diffractometer with Mo target ( $\text{K}\alpha$  radiation, wavelength  $\lambda = 0.71073\text{ \AA}$ ) at room temperature. The program SAINT was utilized to perform data integration, cell refinement, and absorption corrections. The structure models were solved under the direct method and refined through the full matrix least-squares fitting on  $F^2$  with OLEX2 and SHELXTL programs.<sup>[1-2]</sup> The structural validity of them was confirmed by the ADDSYM algorithm from PLATON.<sup>[3]</sup> Table S6 shows the crystal data and structure refinements. The atomic coordinates, equivalent isotropic displacement parameters, and BVS calculations are given in Table S1. Selected bond lengths and angles are listed in Tables S2–5.

### Powder X-ray Diffraction.

Powder X-ray diffraction (XRD) data of polycrystalline materials were obtained via a Bruker D2 PHASER diffractometer equipped with Cu  $\text{K}\alpha$  radiation ( $\lambda = 0.71073\text{ \AA}$ ) at room temperature. The  $2\theta$  range, step size, and fixed counting time were adjusted to  $10\text{--}70^\circ$ , step size  $0.02^\circ$ , and 1 s/step, respectively. No impurities were observed, and the experimental powder XRD profiles are in good agreement with the calculated ones derived from the single-crystal data (Figure S2).

### Thermal Analysis.

Thermal gravimetric (TG) and differential scanning calorimetry (DSC) were carried out on a NETZSCH STA 449C instrument at a temperature range of  $50\text{--}650\text{ }^\circ\text{C}$  with a heating rate of  $5\text{ }^\circ\text{C}\cdot\text{min}^{-1}$  in an atmosphere of flowing  $\text{N}_2$ .

### Optical Spectroscopy.

The IR performance of  $\text{A}_x\text{B}_{4-x}\text{Mo}_5\text{P}_2\text{O}_{22}$  ( $\text{A} = \text{Na}, \text{K}, \text{B} = \text{Rb}, \text{Cs}$ ) in the wavelength region  $400\text{--}4000\text{ cm}^{-1}$  was inspected via a Shimadzu IR Affinity-1 spectrometer at room temperature. The powder sample (nearly 5 mg) was mixed well with about 500 mg of dried KBr (99.9% purity) and compressed into thin cylindrical plates. Meanwhile, the UV diffuse reflectance data of the four compounds were collected with a Shimadzu SolidSpec-3700DUV spectrophotometer at room temperature; the measurement was carried out within the wavelength region  $245\text{--}2500\text{ nm}$ . By using the Kubelka-Munk function<sup>[4]</sup> collected UV reflectance spectrum data was translated into absorbance data.

### Powder SHG Measurement.

This measurement was operated according to the Kurtz–Perry method using a Q-switched Nd:YVO<sub>4</sub> solid-state laser at 1064 nm.<sup>[5]</sup> The polycrystalline samples underwent grinding and sieving, resulting in the classification of particles into specific size ranges as follows: 38–55, 55–88, 88–105, 105–150, 150–200, and 200–250 μm. KDP samples were used as the reference.

#### **Theoretical Calculations.**

The optical properties and electronic structures were investigated by utilizing CASTEP based on density functional theory, a plane-wave pseudopotential total energy package.<sup>[6-7]</sup> The generalized gradient approximation (GGA) with the Perdew–Burke–Ernzerhof exchange–correlation functional was opted for all the calculations,<sup>[8-9]</sup> with the energy cutoffs 750 eV. Norm-conserving pseudopotentials were used, and valence electrons were established by considering the following orbital electrons: O 2s<sup>2</sup>2p<sup>4</sup>, Na 3s<sup>1</sup>, P 3s<sup>2</sup>3p<sup>3</sup>, K 4s<sup>1</sup>, Rb 5s<sup>1</sup>, Cs 6s<sup>1</sup>.<sup>[10]</sup> In the Brillouin zone corresponding to the primitive cell, the k-point separation for K<sub>4</sub>Mo<sub>5</sub>P<sub>2</sub>O<sub>22</sub>, KCs<sub>3</sub>Mo<sub>5</sub>P<sub>2</sub>O<sub>22</sub>, and NaRb<sub>3</sub>Mo<sub>5</sub>P<sub>2</sub>O<sub>22</sub> were set as 0.02, 0.04, and 0.04 Å<sup>-1</sup> respectively. The value of the scissor operator was set as the difference between the experimental band gap and the band gap calculated by the GGA method for the calculation of optical properties. The refractive indices were determined from the real part of the dielectric constant, which was obtained by a Kramers–Kronig transformation of the calculated imaginary part of the dielectric function.

Table S1. Atomic coordinates ( $\times 10^4$ ) and equivalent isotropic displacement parameters ( $\text{\AA}^2 \times 10^3$ ), and bond valence sum (BVS) calculations for  $\text{K}_4\text{Mo}_5\text{P}_2\text{O}_{22}$ ,  $\text{K}_2\text{Rb}_2\text{Mo}_5\text{P}_2\text{O}_{22}$ ,  $\text{KCs}_3\text{Mo}_5\text{P}_2\text{O}_{22}$ , and  $\text{NaRb}_3\text{Mo}_5\text{P}_2\text{O}_{22}$ .  $U_{\text{eq}}$  is defined as one-third of the trace of the orthogonalized  $U_{ij}$  tensor.

| Atom                                                                        | x        | y       | z       | $U_{\text{eq}}$ | BVS   |
|-----------------------------------------------------------------------------|----------|---------|---------|-----------------|-------|
| <b><math>\text{K}_4\text{Mo}_5\text{P}_2\text{O}_{22}</math></b>            |          |         |         |                 |       |
| K(1)                                                                        | 5406(3)  | 7400(1) | 3972(1) | 42(1)           | 0.992 |
| K(2)                                                                        | 475(4)   | 5000    | 5000    | 47(1)           | 0.723 |
| K(3)                                                                        | 10000    | 4228(1) | 7500    | 31(1)           | 1.292 |
| Mo(1)                                                                       | 5000     | 7447(1) | 7500    | 16(1)           | 6.119 |
| Mo(2)                                                                       | 5753(1)  | 6441(1) | 5900(1) | 20(1)           | 6.107 |
| Mo(3)                                                                       | 5021(1)  | 4759(1) | 6410(1) | 19(1)           | 6.033 |
| P(1)                                                                        | 7812(3)  | 5947(1) | 7680(1) | 16(1)           | 5.060 |
| O(1)                                                                        | 6753(9)  | 7996(3) | 7924(3) | 27(1)           | 2.161 |
| O(2)                                                                        | 6669(8)  | 7157(3) | 6631(3) | 20(1)           | 2.074 |
| O(3)                                                                        | 4062(10) | 6916(3) | 5350(3) | 32(1)           | 2.090 |
| O(4)                                                                        | 7998(10) | 6424(3) | 5374(4) | 39(1)           | 1.903 |
| O(5)                                                                        | 6689(8)  | 6538(2) | 8098(3) | 17(1)           | 2.021 |
| O(6)                                                                        | 10000    | 6294(3) | 7500    | 26(2)           | 2.157 |
| O(7)                                                                        | 6844(8)  | 5766(2) | 6887(3) | 19(1)           | 1.949 |
| O(8)                                                                        | 8078(8)  | 5316(2) | 8176(3) | 19(1)           | 1.965 |
| O(9)                                                                        | 7410(9)  | 4460(3) | 6145(3) | 30(1)           | 1.974 |
| O(10)                                                                       | 4691(8)  | 5529(2) | 5709(3) | 24(1)           | 2.041 |
| O(11)                                                                       | 5000     | 4543(3) | 7500    | 21(1)           | 2.123 |
| O(12)                                                                       | 3364(9)  | 4151(3) | 6047(3) | 29(1)           | 1.929 |
| <b><math>\text{K}_2\text{Rb}_2\text{Mo}_5\text{P}_2\text{O}_{22}</math></b> |          |         |         |                 |       |
| K(1)                                                                        | 0        | 5790(1) | 2500    | 30(1)           | 1.28  |
| K(2) 0.5 (S.O.F.)                                                           | 4630(2)  | 2640(1) | 6017(1) | 34(1)           | 1.24  |
| Rb(1)                                                                       | -446(3)  | 5000    | 5000    | 47(1)           | 0.83  |
| Rb(2) 0.5<br>(S.O.F.)                                                       | 4630(2)  | 2640(1) | 6017(1) | 34(1)           | 1.24  |
| Mo(1)                                                                       | 4999(1)  | 5264(1) | 3573(1) | 19(1)           | 6.06  |
| Mo(2)                                                                       | 4285(1)  | 3580(1) | 4078(1) | 20(1)           | 6.14  |
| Mo(3)                                                                       | 5000     | 2574(1) | 2500    | 17(1)           | 6.23  |
| P(1)                                                                        | 2185(3)  | 4076(1) | 2332(1) | 16(1)           | 4.99  |
| O(1)                                                                        | 6647(12) | 5873(4) | 3928(5) | 30(2)           | 1.97  |
| O(2)                                                                        | 2644(12) | 5571(4) | 3832(5) | 30(2)           | 2.00  |
| O(3)                                                                        | 5000     | 5481(4) | 2500    | 21(2)           | 2.10  |
| O(4)                                                                        | 5320(11) | 4497(3) | 4261(4) | 24(2)           | 2.06  |
| O(5)                                                                        | 3159(10) | 4260(3) | 3113(4) | 20(1)           | 1.91  |

|       |          |         |         |       |      |
|-------|----------|---------|---------|-------|------|
| O(6)  | 1953(10) | 4710(3) | 1840(4) | 21(2) | 1.96 |
| O(7)  | 0        | 3729(4) | 2500    | 25(2) | 2.13 |
| O(8)  | 3309(9)  | 3485(3) | 1925(4) | 18(1) | 2.01 |
| O(9)  | 3261(11) | 2022(3) | 2100(4) | 27(2) | 2.26 |
| O(10) | 3395(10) | 2864(4) | 3366(4) | 22(2) | 2.13 |
| O(11) | 5994(13) | 3111(4) | 4617(4) | 35(2) | 2.14 |
| O(12) | 2099(13) | 3581(4) | 4607(5) | 38(2) | 2.03 |

**KCs<sub>3</sub>Mo<sub>5</sub>P<sub>2</sub>O<sub>22</sub>**

|       |           |         |         |       |      |
|-------|-----------|---------|---------|-------|------|
| K(1)  | 0         | 836(3)  | 7500    | 37(1) | 1.19 |
| Cs(1) | 4657(3)   | 5000    | 5000    | 41(1) | 0.81 |
| Cs(2) | 4724(2)   | 2330(1) | 5995(1) | 40(1) | 1.35 |
| Mo(1) | 0         | 2630(1) | 7500    | 21(1) | 6.35 |
| Mo(2) | 60(3)     | 5300(1) | 6466(1) | 23(1) | 6.16 |
| Mo(3) | 625(2)    | 3634(1) | 9035(1) | 24(1) | 6.15 |
| P(1)  | 2824(6)   | 4119(2) | 7359(3) | 19(1) | 5.12 |
| O(1)  | 2720(30)  | 3624(8) | 9575(8) | 38(4) | 2.11 |
| O(2)  | -1120(30) | 3203(7) | 9555(8) | 39(4) | 2.18 |
| O(3)  | 1492(19)  | 2914(6) | 8364(8) | 25(3) | 2.16 |
| O(4)  | 1730(20)  | 2079(6) | 7156(8) | 29(3) | 2.31 |
| O(5)  | 5000      | 3780(8) | 7500    | 28(4) | 2.12 |
| O(6)  | 1700(19)  | 3548(6) | 6965(7) | 19(2) | 2.02 |
| O(7)  | 3040(20)  | 4753(6) | 6896(8) | 24(3) | 1.92 |
| O(8)  | 0         | 5497(8) | 7500    | 29(4) | 2.19 |
| O(9)  | -1890(20) | 4303(6) | 6891(7) | 25(3) | 1.93 |
| O(10) | 360(20)   | 4556(6) | 5788(7) | 31(3) | 2.05 |
| O(11) | 1690(20)  | 5888(7) | 6119(9) | 33(3) | 2.12 |
| O(12) | -2220(20) | 5640(7) | 6203(8) | 31(3) | 1.99 |

**NaRb<sub>3</sub>Mo<sub>5</sub>P<sub>2</sub>O<sub>22</sub>**

|       |          |         |         |       |      |
|-------|----------|---------|---------|-------|------|
| Na(1) | 10000    | 5751(3) | 2500    | 36(2) | 0.75 |
| Rb(1) | 5387(2)  | 2645(1) | 6019(1) | 36(1) | 1.22 |
| Rb(2) | 10458(4) | 5000    | 5000    | 55(1) | 0.80 |
| Mo(1) | 5679(2)  | 3572(1) | 4055(1) | 26(1) | 6.22 |
| Mo(2) | 4975(2)  | 5306(1) | 3555(1) | 27(1) | 6.25 |
| Mo(3) | 5000     | 2522(1) | 2500    | 26(1) | 6.16 |
| P(1)  | 7826(5)  | 4087(2) | 2342(2) | 22(1) | 5.06 |
| O(1)  | 3274(16) | 1948(5) | 2880(6) | 36(3) | 2.15 |
| O(2)  | 6559(14) | 2831(5) | 3368(5) | 27(2) | 2.12 |
| O(3)  | 6709(13) | 3487(5) | 1941(5) | 24(2) | 2.03 |
| O(4)  | 3979(16) | 3108(5) | 4584(5) | 35(3) | 2.21 |
| O(5)  | 7870(17) | 3602(6) | 4576(6) | 39(3) | 2.00 |
| O(6)  | 4598(15) | 4514(4) | 4219(5) | 33(2) | 2.10 |
| O(7)  | 7310(16) | 5604(6) | 3806(6) | 38(3) | 2.02 |
| O(8)  | 3335(17) | 5919(5) | 3911(6) | 38(3) | 2.04 |

|       |          |         |         |       |      |
|-------|----------|---------|---------|-------|------|
| O(9)  | 10000    | 3726(6) | 2500    | 27(3) | 2.13 |
| O(10) | 6870(15) | 4269(5) | 3111(5) | 24(2) | 1.93 |
| O(11) | 8101(14) | 4753(5) | 1874(5) | 28(2) | 1.85 |
| O(12) | 5000     | 5520(6) | 2500    | 29(3) | 2.07 |

(BVS)\* : The bond valence sums were calculated using the formula  $V_i = \sum S_{ij} = \sum \exp[(r_0 - r_{ij}) / B]$ , where  $S_{ij}$  is the bond valence associated with bond length  $r_{ij}$ , and  $r_0$  and  $B$  (usually 0.37) are empirically determined parameters.

Table S2. Selected bond lengths (Å) and angles (°) for  $\text{KCs}_3\text{Mo}_5\text{P}_2\text{O}_{22}$ .

|                      |           |                       |           |
|----------------------|-----------|-----------------------|-----------|
| K(1)-O(4)            | 2.742(13) | Cs(2)-O(6)            | 3.546(13) |
| K(1)-O(4)#3          | 2.742(13) | Cs(2)-O(11)#4         | 3.099(15) |
| K(1)-O(7)#1          | 2.694(14) | Cs(2)-O(12)#4         | 3.548(15) |
| K(1)-O(7)#2          | 2.694(14) | Mo(1)-O(3)            | 1.910(13) |
| K(1)-O(8)#1          | 3.352(3)  | Mo(1)-O(3)#3          | 1.910(13) |
| K(1)-O(8)#4          | 3.352(3)  | Mo(1)-O(4)            | 1.679(14) |
| K(1)-O(11)#1         | 3.289(16) | Mo(1)-O(4)#3          | 1.679(14) |
| K(1)-O(11)#2         | 3.289(16) | Mo(1)-O(6)            | 2.313(12) |
| K(1)-O(12)#4         | 2.973(15) | Mo(1)-O(6)#3          | 2.313(12) |
| K(1)-O(12)#5         | 2.973(15) | Mo(2)-O(7)            | 2.360(13) |
| Cs(1)-O(1)#9         | 3.274(16) | Mo(2)-O(8)            | 1.887(3)  |
| Cs(1)-O(1)#10        | 3.274(16) | Mo(2)-O(9)            | 2.447(13) |
| Cs(1)-O(7)           | 3.581(14) | Mo(2)-O(10)           | 1.899(12) |
| Cs(1)-O(7)#8         | 3.581(14) | Mo(2)-O(11)           | 1.687(14) |
| Cs(1)-O(10)          | 3.269(14) | Mo(2)-O(12)           | 1.707(14) |
| Cs(1)-O(10)#8        | 3.269(14) | Mo(3)-O(1)            | 1.680(15) |
| Cs(1)-O(11)          | 3.282(15) | Mo(3)-O(2)            | 1.698(15) |
| Cs(1)-O(11)#8        | 3.282(15) | Mo(3)-O(3)            | 1.929(14) |
| Cs(1)-O(12)#6        | 3.221(14) | Mo(3)-O(6)#3          | 2.356(11) |
| Cs(1)-O(12)#7        | 3.221(14) | Mo(3)-O(9)#3          | 2.264(14) |
| Cs(2)-O(1)#10        | 3.194(16) | Mo(3)-O(10)#3         | 1.935(11) |
| Cs(2)-O(1)#11        | 3.530(16) | P(1)-O(5)             | 1.595(8)  |
| Cs(2)-O(2)#3         | 3.074(16) | P(1)-O(6)             | 1.508(12) |
| Cs(2)-O(2)#11        | 2.923(15) | P(1)-O(7)             | 1.493(13) |
| Cs(2)-O(3)#10        | 2.964(12) | P(1)-O(9)#3           | 1.516(14) |
| Cs(2)-O(4)           | 2.901(15) |                       |           |
| O(7)#1-K(1)-O(7)#2   | 77.1(6)   | O(7)-Cs(1)-O(7)#8     | 145.6(4)  |
| O(7)#1-K(1)-O(4)#3   | 125.6(4)  | O(4)-Cs(2)-O(2)#11    | 141.5(4)  |
| O(7)#2-K(1)-O(4)#3   | 142.9(4)  | O(4)-Cs(2)-O(3)#10    | 111.0(4)  |
| O(7)#1-K(1)-O(4)     | 142.9(4)  | O(2)#11-Cs(2)-O(3)#10 | 102.3(4)  |
| O(7)#2-K(1)-O(4)     | 125.6(4)  | O(4)-Cs(2)-O(2)#3     | 78.4(4)   |
| O(4)#3-K(1)-O(4)     | 56.2(6)   | O(2)#11-Cs(2)-O(2)#3  | 99.0(3)   |
| O(7)#1-K(1)-O(12)#4  | 83.1(4)   | O(3)#10-Cs(2)-O(2)#3  | 123.9(4)  |
| O(7)#2-K(1)-O(12)#4  | 85.4(4)   | O(4)-Cs(2)-O(11)#4    | 94.6(4)   |
| O(4)#3-K(1)-O(12)#4  | 122.8(4)  | O(2)#11-Cs(2)-O(11)#4 | 67.0(4)   |
| O(4)-K(1)-O(12)#4    | 71.6(4)   | O(3)#10-Cs(2)-O(11)#4 | 88.2(4)   |
| O(7)#1-K(1)-O(12)#5  | 85.4(4)   | O(2)#3-Cs(2)-O(11)#4  | 147.6(4)  |
| O(7)#2-K(1)-O(12)#5  | 83.1(4)   | O(4)-Cs(2)-O(1)#10    | 135.9(4)  |
| O(4)#3-K(1)-O(12)#5  | 71.6(4)   | O(2)#11-Cs(2)-O(1)#10 | 80.4(4)   |
| O(4)-K(1)-O(12)#5    | 122.8(4)  | O(3)#10-Cs(2)-O(1)#10 | 51.7(4)   |
| O(12)#4-K(1)-O(12)#5 | 165.3(6)  | O(2)#3-Cs(2)-O(1)#10  | 82.4(4)   |
| O(7)#1-K(1)-O(11)#2  | 129.8(4)  | O(11)#4-Cs(2)-O(1)#10 | 121.1(4)  |
| O(7)#2-K(1)-O(11)#2  | 53.7(4)   | O(4)-Cs(2)-O(1)#11    | 96.7(4)   |



|                       |          |                       |          |
|-----------------------|----------|-----------------------|----------|
| O(4)#3-K(1)-O(11)#2   | 94.5(4)  | O(2)#11-Cs(2)-O(1)#11 | 47.4(4)  |
| O(4)-K(1)-O(11)#2     | 82.4(4)  | O(3)#10-Cs(2)-O(1)#11 | 149.4(4) |
| O(12)#4-K(1)-O(11)#2  | 100.5(4) | O(2)#3-Cs(2)-O(1)#11  | 73.2(4)  |
| O(12)#5-K(1)-O(11)#2  | 79.9(4)  | O(11)#4-Cs(2)-O(1)#11 | 76.4(4)  |
| O(7)#1-K(1)-O(11)#1   | 53.7(4)  | O(1)#10-Cs(2)-O(1)#11 | 115.1(2) |
| O(7)#2-K(1)-O(11)#1   | 129.8(4) | O(4)-Cs(2)-O(6)       | 51.9(3)  |
| O(4)#3-K(1)-O(11)#1   | 82.4(4)  | O(2)#11-Cs(2)-O(6)    | 147.5(4) |
| O(4)-K(1)-O(11)#1     | 94.5(4)  | O(3)#10-Cs(2)-O(6)    | 91.5(3)  |
| O(12)#4-K(1)-O(11)#1  | 79.9(4)  | O(2)#3-Cs(2)-O(6)     | 49.8(3)  |
| O(12)#5-K(1)-O(11)#1  | 100.5(4) | O(11)#4-Cs(2)-O(6)    | 143.6(3) |
| O(11)#2-K(1)-O(11)#1  | 176.5(5) | O(1)#10-Cs(2)-O(6)    | 85.7(3)  |
| O(7)#1-K(1)-O(8)#1    | 51.6(4)  | O(1)#11-Cs(2)-O(6)    | 116.6(3) |
| O(7)#2-K(1)-O(8)#1    | 108.3(4) | O(4)-Cs(2)-O(12)#4    | 61.6(3)  |
| O(4)#3-K(1)-O(8)#1    | 76.5(4)  | O(2)#11-Cs(2)-O(12)#4 | 82.9(4)  |
| O(4)-K(1)-O(8)#1      | 125.4(4) | O(3)#10-Cs(2)-O(12)#4 | 128.1(3) |
| O(12)#4-K(1)-O(8)#1   | 125.2(3) | O(2)#3-Cs(2)-O(12)#4  | 105.5(4) |
| O(12)#5-K(1)-O(8)#1   | 51.2(3)  | O(11)#4-Cs(2)-O(12)#4 | 45.9(3)  |
| O(11)#2-K(1)-O(8)#1   | 130.8(3) | O(1)#10-Cs(2)-O(12)#4 | 162.5(4) |
| O(11)#1-K(1)-O(8)#1   | 50.1(3)  | O(1)#11-Cs(2)-O(12)#4 | 54.8(3)  |
| O(7)#1-K(1)-O(8)#4    | 108.3(4) | O(6)-Cs(2)-O(12)#4    | 111.5(3) |
| O(7)#2-K(1)-O(8)#4    | 51.6(4)  | O(4)-Mo(1)-O(4)#3     | 100.6(9) |
| O(4)#3-K(1)-O(8)#4    | 125.4(4) | O(4)-Mo(1)-O(3)       | 97.6(6)  |
| O(4)-K(1)-O(8)#4      | 76.5(4)  | O(4)#3-Mo(1)-O(3)     | 103.6(6) |
| O(12)#4-K(1)-O(8)#4   | 51.2(3)  | O(4)-Mo(1)-O(3)#3     | 103.6(6) |
| O(12)#5-K(1)-O(8)#4   | 125.2(3) | O(4)#3-Mo(1)-O(3)#3   | 97.6(6)  |
| O(11)#2-K(1)-O(8)#4   | 50.1(3)  | O(3)-Mo(1)-O(3)#3     | 146.5(7) |
| O(11)#1-K(1)-O(8)#4   | 130.8(3) | O(4)-Mo(1)-O(6)       | 90.9(5)  |
| O(8)#1-K(1)-O(8)#4    | 157.3(5) | O(4)#3-Mo(1)-O(6)     | 166.2(6) |
| O(12)#6-Cs(1)-O(12)#7 | 100.9(5) | O(3)-Mo(1)-O(6)       | 82.1(5)  |
| O(12)#6-Cs(1)-O(10)   | 111.4(3) | O(3)#3-Mo(1)-O(6)     | 72.0(5)  |
| O(12)#7-Cs(1)-O(10)   | 137.3(3) | O(4)-Mo(1)-O(6)#3     | 166.2(6) |
| O(12)#6-Cs(1)-O(10)#8 | 137.3(3) | O(4)#3-Mo(1)-O(6)#3   | 90.9(5)  |
| O(12)#7-Cs(1)-O(10)#8 | 111.4(3) | O(3)-Mo(1)-O(6)#3     | 72.0(5)  |
| O(10)-Cs(1)-O(10)#8   | 60.7(5)  | O(3)#3-Mo(1)-O(6)#3   | 82.1(5)  |
| O(12)#6-Cs(1)-O(1)#9  | 60.2(4)  | O(6)-Mo(1)-O(6)#3     | 78.9(6)  |
| O(12)#7-Cs(1)-O(1)#9  | 80.0(4)  | O(11)-Mo(2)-O(12)     | 101.3(8) |
| O(10)-Cs(1)-O(1)#9    | 140.4(3) | O(11)-Mo(2)-O(8)      | 103.6(6) |
| O(10)#8-Cs(1)-O(1)#9  | 98.0(4)  | O(12)-Mo(2)-O(8)      | 99.9(5)  |
| O(12)#6-Cs(1)-O(1)#10 | 80.0(4)  | O(11)-Mo(2)-O(10)     | 102.4(6) |
| O(12)#7-Cs(1)-O(1)#10 | 60.2(4)  | O(12)-Mo(2)-O(10)     | 102.2(7) |
| O(10)-Cs(1)-O(1)#10   | 98.0(4)  | O(8)-Mo(2)-O(10)      | 141.5(6) |
| O(10)#8-Cs(1)-O(1)#10 | 140.4(3) | O(11)-Mo(2)-O(7)      | 84.0(6)  |
| O(1)#9-Cs(1)-O(1)#10  | 116.4(6) | O(12)-Mo(2)-O(7)      | 174.6(6) |
| O(12)#6-Cs(1)-O(11)#8 | 171.0(3) | O(8)-Mo(2)-O(7)       | 77.9(4)  |

|                       |          |                      |          |
|-----------------------|----------|----------------------|----------|
| O(12)#7-Cs(1)-O(11)#8 | 76.6(3)  | O(10)-Mo(2)-O(7)     | 77.1(5)  |
| O(10)-Cs(1)-O(11)#8   | 67.1(4)  | O(11)-Mo(2)-O(9)     | 170.2(6) |
| O(10)#8-Cs(1)-O(11)#8 | 50.6(3)  | O(12)-Mo(2)-O(9)     | 86.0(6)  |
| O(1)#9-Cs(1)-O(11)#8  | 127.0(4) | O(8)-Mo(2)-O(9)      | 81.2(5)  |
| O(1)#10-Cs(1)-O(11)#8 | 91.4(3)  | O(10)-Mo(2)-O(9)     | 69.4(5)  |
| O(12)#6-Cs(1)-O(11)   | 76.6(3)  | O(7)-Mo(2)-O(9)      | 88.7(5)  |
| O(12)#7-Cs(1)-O(11)   | 171.0(3) | O(1)-Mo(3)-O(2)      | 103.5(8) |
| O(10)-Cs(1)-O(11)     | 50.6(3)  | O(1)-Mo(3)-O(3)      | 96.1(6)  |
| O(10)#8-Cs(1)-O(11)   | 67.1(4)  | O(2)-Mo(3)-O(3)      | 100.4(7) |
| O(1)#9-Cs(1)-O(11)    | 91.4(3)  | O(1)-Mo(3)-O(10)#3   | 101.0(7) |
| O(1)#10-Cs(1)-O(11)   | 127.0(4) | O(2)-Mo(3)-O(10)#3   | 98.1(7)  |
| O(11)#8-Cs(1)-O(11)   | 107.2(5) | O(3)-Mo(3)-O(10)#3   | 151.0(5) |
| O(12)#6-Cs(1)-O(7)    | 67.0(3)  | O(1)-Mo(3)-O(9)#3    | 97.1(6)  |
| O(12)#7-Cs(1)-O(7)    | 140.1(3) | O(2)-Mo(3)-O(9)#3    | 158.8(7) |
| O(10)-Cs(1)-O(7)      | 45.7(3)  | O(3)-Mo(3)-O(9)#3    | 81.7(5)  |
| O(10)#8-Cs(1)-O(7)    | 100.8(3) | O(10)#3-Mo(3)-O(9)#3 | 73.1(5)  |
| O(1)#9-Cs(1)-O(7)     | 119.0(3) | O(1)-Mo(3)-O(6)#3    | 164.9(7) |
| O(1)#10-Cs(1)-O(7)    | 80.0(3)  | O(2)-Mo(3)-O(6)#3    | 86.6(6)  |
| O(11)#8-Cs(1)-O(7)    | 109.3(4) | O(3)-Mo(3)-O(6)#3    | 70.7(5)  |
| O(11)-Cs(1)-O(7)      | 47.1(3)  | O(10)#3-Mo(3)-O(6)#3 | 88.4(5)  |
| O(12)#6-Cs(1)-O(7)#8  | 140.1(3) | O(9)#3-Mo(3)-O(6)#3  | 74.1(5)  |
| O(12)#7-Cs(1)-O(7)#8  | 67.0(3)  | O(7)-P(1)-O(6)       | 113.4(8) |
| O(10)-Cs(1)-O(7)#8    | 100.8(3) | O(7)-P(1)-O(9)#3     | 109.5(7) |
| O(10)#8-Cs(1)-O(7)#8  | 45.7(3)  | O(6)-P(1)-O(9)#3     | 112.9(7) |
| O(1)#9-Cs(1)-O(7)#8   | 80.0(3)  | O(7)-P(1)-O(5)       | 110.0(7) |
| O(1)#10-Cs(1)-O(7)#8  | 119.0(3) | O(6)-P(1)-O(5)       | 102.0(7) |
| O(11)#8-Cs(1)-O(7)#8  | 47.1(3)  | O(9)#3-P(1)-O(5)     | 108.7(6) |
| O(11)-Cs(1)-O(7)#8    | 109.3(4) |                      |          |

---

Symmetry transformations used to generate equivalent atoms:

|                         |                             |                             |
|-------------------------|-----------------------------|-----------------------------|
| #1 $x-1/2, y-1/2, z$    | #2 $-x+1/2, y-1/2, -z+3/2$  | #3 $-x, y, -z+3/2$          |
| #4 $x+1/2, y-1/2, z$    | #5 $-x-1/2, y-1/2, -z+3/2$  | #6 $x+1, y, z$              |
| #7 $x+1, -y+1, -z+1$    | #8 $x, -y+1, -z+1$          | #9 $-x+1, -y+1, z-1/2$      |
| #10 $-x+1, y, -z+3/2$   | #11 $-x+1/2, -y+1/2, z-1/2$ | #12 $x-1, y, z$             |
| #13 $x+1/2, y+1/2, z$   | #14 $x-1/2, y+1/2, z$       | #15 $-x+1/2, -y+1/2, z+1/2$ |
| #16 $-x+1, -y+1, z+1/2$ |                             |                             |

Table S3. Selected bond lengths (Å) and angles (°) for K<sub>4</sub>Mo<sub>5</sub>P<sub>2</sub>O<sub>22</sub>.

|                     |            |                       |            |
|---------------------|------------|-----------------------|------------|
| K(1)-O(1)#2         | 2.665(6)   | K(3)-O(12)#8          | 3.291(6)   |
| K(1)-O(2)#1         | 2.752(5)   | K(3)-O(12)#12         | 3.291(6)   |
| K(1)-O(3)           | 2.667(6)   | Mo(1)-O(1)            | 1.706(5)   |
| K(1)-O(3)#3         | 2.933(7)   | Mo(1)-O(1)#8          | 1.706(5)   |
| K(1)-O(4)#1         | 2.960(6)   | Mo(1)-O(2)            | 1.911(5)   |
| K(1)-O(5)#2         | 3.144(5)   | Mo(1)-O(2)#8          | 1.911(5)   |
| K(1)-O(12)#4        | 3.259(6)   | Mo(1)-O(5)            | 2.297(5)   |
| K(2)-O(4)#5         | 3.233(7)   | Mo(1)-O(5)#8          | 2.296(5)   |
| K(2)-O(4)#6         | 3.233(7)   | Mo(2)-O(2)            | 1.948(5)   |
| K(2)-O(8)#7         | 3.296(5)   | Mo(2)-O(3)            | 1.703(6)   |
| K(2)-O(8)#8         | 3.296(5)   | Mo(2)-O(4)            | 1.700(6)   |
| K(2)-O(9)#5         | 2.961(6)   | Mo(2)-O(5)#8          | 2.328(5)   |
| K(2)-O(9)#6         | 2.961(6)   | Mo(2)-O(7)            | 2.236(5)   |
| K(2)-O(10)          | 3.141(5)   | Mo(2)-O(10)           | 1.911(5)   |
| K(2)-O(10)#4        | 3.141(5)   | Mo(3)-O(7)            | 2.406(5)   |
| K(2)-O(12)          | 3.050(6)   | Mo(3)-O(8)#8          | 2.373(5)   |
| K(2)-O(12)#4        | 3.050(6)   | Mo(3)-O(9)            | 1.703(6)   |
| K(3)-O(1)#9         | 2.722(5)   | Mo(3)-O(10)           | 1.912(5)   |
| K(3)-O(1)#11        | 2.722(5)   | Mo(3)-O(11)           | 1.9010(15) |
| K(3)-O(8)           | 2.691(5)   | Mo(3)-O(12)           | 1.699(5)   |
| K(3)-O(8)#10        | 2.691(5)   | P(1)-O(5)             | 1.523(5)   |
| K(3)-O(9)           | 2.881(6)   | P(1)-O(6)             | 1.589(3)   |
| K(3)-O(9)#10        | 2.881(6)   | P(1)-O(7)             | 1.526(5)   |
| K(3)-O(11)          | 3.2771(12) | P(1)-O(8)             | 1.488(5)   |
| K(3)-O(11)#12       | 3.2771(12) |                       |            |
| O(1)#2-K(1)-O(2)#1  | 116.08(18) | O(8)-K(3)-O(1)#11     | 126.86(17) |
| O(1)#2-K(1)-O(3)    | 135.34(19) | O(8)#10-K(3)-O(1)#9   | 126.86(16) |
| O(1)#2-K(1)-O(3)#3  | 80.78(17)  | O(8)#10-K(3)-O(1)#11  | 139.01(15) |
| O(1)#2-K(1)-O(4)#1  | 146.0(2)   | O(8)#10-K(3)-O(8)     | 77.8(2)    |
| O(1)#2-K(1)-O(5)#2  | 57.36(14)  | O(8)-K(3)-O(9)        | 87.42(15)  |
| O(1)#2-K(1)-O(12)#4 | 90.53(16)  | O(8)-K(3)-O(9)#10     | 78.66(16)  |
| O(2)#1-K(1)-O(3)#3  | 135.22(17) | O(8)#10-K(3)-O(9)     | 78.66(16)  |
| O(2)#1-K(1)-O(4)#1  | 56.29(16)  | O(8)#10-K(3)-O(9)#10  | 87.42(15)  |
| O(2)#1-K(1)-O(5)#2  | 98.21(15)  | O(8)-K(3)-O(11)       | 53.42(14)  |
| O(2)#1-K(1)-O(12)#4 | 85.81(16)  | O(8)-K(3)-O(11)#12    | 107.95(15) |
| O(3)-K(1)-O(2)#1    | 98.74(19)  | O(8)#10-K(3)-O(11)    | 107.95(15) |
| O(3)-K(1)-O(3)#3    | 94.08(14)  | O(8)#10-K(3)-O(11)#12 | 53.42(14)  |
| O(3)-K(1)-O(4)#1    | 76.47(19)  | O(8)-K(3)-O(12)#8     | 53.91(13)  |
| O(3)#3-K(1)-O(4)#1  | 86.00(18)  | O(8)-K(3)-O(12)#12    | 131.24(16) |
| O(3)-K(1)-O(5)#2    | 146.68(17) | O(8)#10-K(3)-O(12)#8  | 131.24(15) |
| O(3)#3-K(1)-O(5)#2  | 54.34(14)  | O(8)#10-K(3)-O(12)#12 | 53.91(13)  |
| O(3)-K(1)-O(12)#4   | 63.81(16)  | O(9)-K(3)-O(9)#10     | 162.1(2)   |
| O(3)#3-K(1)-O(12)#4 | 137.55(16) | O(9)-K(3)-O(11)       | 53.29(12)  |

|                     |            |                        |            |
|---------------------|------------|------------------------|------------|
| O(4)#1-K(1)-O(5)#2  | 89.60(17)  | O(9)-K(3)-O(11)#12     | 122.71(13) |
| O(4)#1-K(1)-O(12)#4 | 119.45(19) | O(9)#10-K(3)-O(11)     | 122.71(13) |
| O(5)#2-K(1)-O(12)#4 | 146.09(14) | O(9)#10-K(3)-O(11)#12  | 53.29(12)  |
| O(4)#5-K(2)-O(4)#6  | 120.8(2)   | O(9)-K(3)-O(12)#8      | 103.12(15) |
| O(4)#5-K(2)-O(8)#7  | 78.33(14)  | O(9)-K(3)-O(12)#12     | 77.71(15)  |
| O(4)#5-K(2)-O(8)#8  | 118.77(14) | O(9)#10-K(3)-O(12)#8   | 77.71(15)  |
| O(4)#6-K(2)-O(8)#7  | 118.77(14) | O(9)#10-K(3)-O(12)#12  | 103.12(15) |
| O(4)#6-K(2)-O(8)#8  | 78.33(14)  | O(11)#12-K(3)-O(11)    | 158.7(2)   |
| O(8)#8-K(2)-O(8)#7  | 147.2(2)   | O(11)#12-K(3)-O(12)#8  | 130.96(10) |
| O(9)#5-K(2)-O(4)#5  | 80.70(16)  | O(11)#12-K(3)-O(12)#12 | 50.30(10)  |
| O(9)#5-K(2)-O(4)#6  | 60.23(16)  | O(12)#8-K(3)-O(12)#12  | 174.8(2)   |
| O(9)#6-K(2)-O(4)#5  | 60.23(16)  | O(1)-Mo(1)-O(1)#8      | 103.6(3)   |
| O(9)#6-K(2)-O(4)#6  | 80.70(16)  | O(1)-Mo(1)-O(2)#8      | 103.1(2)   |
| O(9)#5-K(2)-O(8)#7  | 68.54(15)  | O(1)#8-Mo(1)-O(2)      | 103.1(2)   |
| O(9)#5-K(2)-O(8)#8  | 137.98(15) | O(1)#8-Mo(1)-O(2)#8    | 97.8(2)    |
| O(9)#6-K(2)-O(8)#7  | 137.98(15) | O(1)-Mo(1)-O(2)        | 97.8(2)    |
| O(9)#6-K(2)-O(8)#8  | 68.54(15)  | O(1)-Mo(1)-O(5)        | 88.3(2)    |
| O(9)#5-K(2)-O(9)#6  | 96.4(2)    | O(1)-Mo(1)-O(5)#8      | 166.4(2)   |
| O(9)#5-K(2)-O(10)   | 135.70(14) | O(1)#8-Mo(1)-O(5)      | 166.4(2)   |
| O(9)#5-K(2)-O(10)#4 | 115.93(15) | O(1)#8-Mo(1)-O(5)#8    | 88.3(2)    |
| O(9)#6-K(2)-O(10)   | 115.93(15) | O(2)-Mo(1)-O(2)#8      | 146.0(3)   |
| O(9)#6-K(2)-O(10)#4 | 135.70(14) | O(2)-Mo(1)-O(5)        | 81.56(19)  |
| O(9)#5-K(2)-O(12)   | 168.11(14) | O(2)-Mo(1)-O(5)#8      | 72.6(2)    |
| O(9)#5-K(2)-O(12)#4 | 80.50(16)  | O(2)#8-Mo(1)-O(5)      | 72.65(19)  |
| O(9)#6-K(2)-O(12)   | 80.50(16)  | O(2)#8-Mo(1)-O(5)#8    | 81.56(19)  |
| O(9)#6-K(2)-O(12)#4 | 168.11(14) | O(5)#8-Mo(1)-O(5)      | 80.8(2)    |
| O(10)-K(2)-O(4)#5   | 140.95(15) | O(2)-Mo(2)-O(5)#8      | 71.31(19)  |
| O(10)-K(2)-O(4)#6   | 94.41(15)  | O(2)-Mo(2)-O(7)        | 80.53(19)  |
| O(10)#4-K(2)-O(4)#5 | 94.41(15)  | O(3)-Mo(2)-O(2)        | 99.5(2)    |
| O(10)#4-K(2)-O(4)#6 | 140.95(15) | O(3)-Mo(2)-O(5)#8      | 85.8(2)    |
| O(10)-K(2)-O(8)#7   | 100.19(14) | O(3)-Mo(2)-O(7)        | 157.8(2)   |
| O(10)-K(2)-O(8)#8   | 48.25(13)  | O(3)-Mo(2)-O(10)       | 99.9(2)    |
| O(10)#4-K(2)-O(8)#7 | 48.25(13)  | O(4)-Mo(2)-O(2)        | 95.3(3)    |
| O(10)#4-K(2)-O(8)#8 | 100.19(14) | O(4)-Mo(2)-O(3)        | 105.4(3)   |
| O(10)#4-K(2)-O(10)  | 60.31(19)  | O(4)-Mo(2)-O(5)#8      | 164.1(3)   |
| O(12)-K(2)-O(4)#5   | 87.85(14)  | O(4)-Mo(2)-O(7)        | 96.7(3)    |
| O(12)-K(2)-O(4)#6   | 129.79(16) | O(4)-Mo(2)-O(10)       | 101.4(3)   |
| O(12)#4-K(2)-O(4)#5 | 129.79(16) | O(7)-Mo(2)-O(5)#8      | 73.07(18)  |
| O(12)#4-K(2)-O(4)#6 | 87.84(14)  | O(10)-Mo(2)-O(2)       | 150.0(2)   |
| O(12)-K(2)-O(8)#7   | 106.15(15) | O(10)-Mo(2)-O(5)#8     | 87.5(2)    |
| O(12)-K(2)-O(8)#8   | 51.46(13)  | O(10)-Mo(2)-O(7)       | 72.95(19)  |
| O(12)#4-K(2)-O(8)#7 | 51.46(13)  | O(8)#8-Mo(3)-O(7)      | 86.93(17)  |
| O(12)#4-K(2)-O(8)#8 | 106.14(15) | O(9)-Mo(3)-O(7)        | 85.4(2)    |
| O(12)-K(2)-O(10)    | 54.65(14)  | O(9)-Mo(3)-O(8)#8      | 172.3(2)   |

|                       |            |                    |           |
|-----------------------|------------|--------------------|-----------|
| O(12)-K(2)-O(10)#4    | 61.53(14)  | O(9)-Mo(3)-O(10)   | 101.3(3)  |
| O(12)#4-K(2)-O(10)    | 61.53(14)  | O(9)-Mo(3)-O(11)   | 101.0(2)  |
| O(12)#4-K(2)-O(10)#4  | 54.65(14)  | O(10)-Mo(3)-O(7)   | 68.98(19) |
| O(12)-K(2)-O(12)#4    | 104.8(2)   | O(10)-Mo(3)-O(8)#8 | 75.0(2)   |
| O(1)#11-K(3)-O(1)#9   | 59.0(2)    | O(11)-Mo(3)-O(7)   | 81.4(2)   |
| O(1)#9-K(3)-O(9)      | 125.99(17) | O(11)-Mo(3)-O(8)#8 | 78.65(15) |
| O(1)#9-K(3)-O(9)#10   | 71.50(16)  | O(11)-Mo(3)-O(10)  | 140.9(2)  |
| O(1)#11-K(3)-O(9)     | 71.50(16)  | O(12)-Mo(3)-O(7)   | 169.5(2)  |
| O(1)#11-K(3)-O(9)#10  | 125.99(17) | O(12)-Mo(3)-O(8)#8 | 83.7(2)   |
| O(1)#9-K(3)-O(11)     | 124.66(16) | O(12)-Mo(3)-O(9)   | 103.8(3)  |
| O(1)#9-K(3)-O(11)#12  | 75.71(15)  | O(12)-Mo(3)-O(10)  | 103.7(2)  |
| O(1)#11-K(3)-O(11)    | 75.71(15)  | O(12)-Mo(3)-O(11)  | 101.5(2)  |
| O(1)#11-K(3)-O(11)#12 | 124.66(16) | O(5)-P(1)-O(6)     | 101.4(3)  |
| O(1)#9-K(3)-O(12)#8   | 91.99(16)  | O(5)-P(1)-O(7)     | 112.9(3)  |
| O(1)#9-K(3)-O(12)#12  | 83.50(16)  | O(7)-P(1)-O(6)     | 106.7(2)  |
| O(1)#11-K(3)-O(12)#8  | 83.50(16)  | O(8)-P(1)-O(5)     | 113.5(3)  |
| O(1)#11-K(3)-O(12)#12 | 91.99(16)  | O(8)-P(1)-O(6)     | 110.5(3)  |
| O(8)-K(3)-O(1)#9      | 139.01(15) | O(8)-P(1)-O(7)     | 111.3(3)  |

Symmetry transformations used to generate equivalent atoms:

|                             |                             |                          |
|-----------------------------|-----------------------------|--------------------------|
| #1 $x-1/2, -y+3/2, -z+1$    | #2 $-x+3/2, -y+3/2, z-1/2$  | #3 $x+1/2, -y+3/2, -z+1$ |
| #4 $x, -y+1, -z+1$          | #5 $x-1, -y+1, -z+1$        | #6 $x-1, y, z$           |
| #7 $-x+1, -y+1, z-1/2$      | #8 $-x+1, y, -z+3/2$        | #9 $x+1/2, y-1/2, z$     |
| #10 $-x+2, y, -z+3/2$       | #11 $-x+3/2, y-1/2, -z+3/2$ | #12 $x+1, y, z$          |
| #13 $-x+3/2, -y+3/2, z+1/2$ | #14 $x-1/2, y+1/2, z$       | #15 $-x+1, -y+1, z+1/2$  |

Table S4. Selected bond lengths (Å) and angles (°) for K<sub>2</sub>Rb<sub>2</sub>Mo<sub>5</sub>P<sub>2</sub>O<sub>22</sub>.

|                     |            |                       |            |
|---------------------|------------|-----------------------|------------|
| K(1)-O(3)           | 3.2985(16) | Rb(2)-O(1)#2          | 3.146(8)   |
| K(1)-O(3)#8         | 3.2985(16) | Rb(2)-O(12)#4         | 3.040(8)   |
| K(1)-O(6)           | 2.687(7)   | Rb(2)-O(12)           | 3.454(9)   |
| K(1)-O(6)#10        | 2.687(7)   | Mo(1)-O(3)            | 1.904(2)   |
| K(1)-O(9)#13        | 2.712(7)   | Mo(1)-O(4)            | 1.907(6)   |
| K(1)-O(9)#14        | 2.712(7)   | Mo(1)-O(5)            | 2.405(7)   |
| K(1)-O(2)#10        | 2.906(8)   | Mo(1)-O(6)#3          | 2.357(7)   |
| K(1)-O(2)           | 2.906(8)   | Mo(1)-O(2)            | 1.698(7)   |
| K(1)-O(1)#3         | 3.297(8)   | Mo(1)-O(1)            | 1.700(7)   |
| K(1)-O(1)#8         | 3.297(8)   | Mo(2)-O(4)            | 1.913(6)   |
| K(2)-O(11)          | 2.735(8)   | Mo(2)-O(5)            | 2.245(7)   |
| Rb(1)-O(4)#8        | 3.182(7)   | Mo(2)-O(10)           | 1.936(7)   |
| Rb(1)-O(4)#9        | 3.182(7)   | Mo(2)-O(8)#3          | 2.343(6)   |
| Rb(1)-O(6)#10       | 3.380(7)   | Mo(2)-O(11)           | 1.708(8)   |
| Rb(1)-O(6)#11       | 3.380(7)   | Mo(2)-O(12)           | 1.689(8)   |
| Rb(1)-O(2)#2        | 3.052(8)   | Mo(3)-O(10)#3         | 1.908(7)   |
| Rb(1)-O(2)          | 3.052(8)   | Mo(3)-O(10)           | 1.908(7)   |
| Rb(1)-O(1)#8        | 3.134(8)   | Mo(3)-O(8)#3          | 2.295(7)   |
| Rb(1)-O(1)#9        | 3.134(8)   | Mo(3)-O(8)            | 2.295(7)   |
| Rb(1)-O(12)         | 3.261(8)   | Mo(3)-O(9)            | 1.696(7)   |
| Rb(1)-O(12)#2       | 3.261(8)   | Mo(3)-O(9)#3          | 1.696(7)   |
| Rb(2)-O(10)#4       | 2.837(7)   | P(1)-O(5)             | 1.534(7)   |
| Rb(2)-O(8)#12       | 3.285(6)   | P(1)-O(8)             | 1.522(7)   |
| Rb(2)-O(11)#7       | 2.975(9)   | P(1)-O(6)             | 1.495(7)   |
| Rb(2)-O(11)         | 2.735(8)   | P(1)-O(7)             | 1.594(4)   |
| Rb(2)-O(9)#12       | 2.732(7)   |                       |            |
| O(1)#8-K(1)-O(3)    | 131.12(14) | O(4)#8-Rb(1)-O(6)#11  | 100.36(17) |
| O(1)#8-K(1)-O(3)#8  | 50.18(13)  | O(4)#9-Rb(1)-O(6)#10  | 100.36(17) |
| O(1)#3-K(1)-O(3)    | 50.18(13)  | O(4)#9-Rb(1)-O(6)#11  | 47.21(17)  |
| O(1)#3-K(1)-O(3)#8  | 131.12(14) | O(4)#8-Rb(1)-O(6)#10  | 47.21(17)  |
| O(1)#8-K(1)-O(1)#3  | 174.5(3)   | O(4)#8-Rb(1)-O(12)    | 95.68(19)  |
| O(2)#10-K(1)-O(3)#8 | 52.63(14)  | O(4)#9-Rb(1)-O(12)#2  | 95.68(19)  |
| O(2)-K(1)-O(3)#8    | 123.68(16) | O(4)#8-Rb(1)-O(12)#2  | 140.86(18) |
| O(2)#10-K(1)-O(3)   | 123.68(16) | O(4)#9-Rb(1)-O(12)    | 140.86(18) |
| O(2)-K(1)-O(3)      | 52.63(14)  | O(6)#10-Rb(1)-O(6)#11 | 146.4(2)   |
| O(2)#10-K(1)-O(2)   | 163.3(3)   | O(12)-Rb(1)-O(6)#11   | 118.75(19) |
| O(2)#10-K(1)-O(1)#8 | 102.28(19) | O(12)#2-Rb(1)-O(6)#10 | 118.75(19) |
| O(2)-K(1)-O(1)#3    | 102.29(19) | O(12)#2-Rb(1)-O(6)#11 | 79.17(19)  |
| O(2)-K(1)-O(1)#8    | 78.53(19)  | O(12)-Rb(1)-O(6)#10   | 79.17(19)  |
| O(2)#10-K(1)-O(1)#3 | 78.53(19)  | O(12)-Rb(1)-O(12)#2   | 119.2(3)   |
| O(3)-K(1)-O(3)#8    | 159.2(3)   | O(1)#2-Rb(2)-O(8)#12  | 145.66(18) |
| O(6)-K(1)-O(3)      | 52.90(19)  | O(1)#2-Rb(2)-O(12)    | 75.1(2)    |
| O(6)#10-K(1)-O(3)#8 | 52.90(19)  | O(8)#12-Rb(2)-O(12)   | 114.02(18) |

|                      |           |                       |            |
|----------------------|-----------|-----------------------|------------|
| O(6)#10-K(1)-O(3)    | 108.9(2)  | O(9)#12-Rb(2)-O(10)#4 | 114.5(2)   |
| O(6)-K(1)-O(3)#8     | 108.9(2)  | O(9)#12-Rb(2)-O(8)#12 | 55.21(18)  |
| O(6)#10-K(1)-O(6)    | 78.8(3)   | O(9)#12-Rb(2)-O(11)   | 138.8(2)   |
| O(6)-K(1)-O(9)#13    | 139.6(2)  | O(9)#12-Rb(2)-O(11)#7 | 79.9(2)    |
| O(6)#10-K(1)-O(9)#14 | 139.6(2)  | O(9)#12-Rb(2)-O(1)#2  | 92.8(2)    |
| O(6)#10-K(1)-O(9)#13 | 125.9(2)  | O(9)#12-Rb(2)-O(12)   | 92.0(2)    |
| O(6)-K(1)-O(9)#14    | 125.9(2)  | O(9)#12-Rb(2)-O(12)#4 | 142.2(2)   |
| O(6)-K(1)-O(2)       | 87.0(2)   | O(10)#4-Rb(2)-O(8)#12 | 95.44(18)  |
| O(6)#10-K(1)-O(2)#10 | 87.0(2)   | O(10)#4-Rb(2)-O(11)#7 | 131.0(2)   |
| O(6)-K(1)-O(2)#10    | 80.1(2)   | O(10)#4-Rb(2)-O(1)#2  | 86.6(2)    |
| O(6)#10-K(1)-O(2)    | 80.1(2)   | O(10)#4-Rb(2)-O(12)   | 148.7(2)   |
| O(6)-K(1)-O(1)#8     | 131.8(2)  | O(10)#4-Rb(2)-O(12)#4 | 54.3(2)    |
| O(6)#10-K(1)-O(1)#8  | 53.64(19) | O(11)-Rb(2)-O(10)#4   | 99.7(2)    |
| O(6)-K(1)-O(1)#3     | 53.64(19) | O(11)#7-Rb(2)-O(8)#12 | 52.91(19)  |
| O(6)#10-K(1)-O(1)#3  | 131.8(2)  | O(11)-Rb(2)-O(8)#12   | 146.1(2)   |
| O(9)#13-K(1)-O(3)#8  | 75.4(2)   | O(11)-Rb(2)-O(11)#7   | 95.15(18)  |
| O(9)#13-K(1)-O(3)    | 124.5(2)  | O(11)-Rb(2)-O(1)#2    | 65.9(2)    |
| O(9)#14-K(1)-O(3)    | 75.4(2)   | O(11)#7-Rb(2)-O(1)#2  | 141.4(2)   |
| O(9)#14-K(1)-O(3)#8  | 124.5(2)  | O(11)-Rb(2)-O(12)     | 49.8(2)    |
| O(9)#14-K(1)-O(9)#13 | 58.4(3)   | O(11)#7-Rb(2)-O(12)   | 67.4(2)    |
| O(9)#13-K(1)-O(2)    | 125.1(2)  | O(11)-Rb(2)-O(12)#4   | 76.7(2)    |
| O(9)#14-K(1)-O(2)#10 | 125.1(2)  | O(11)#7-Rb(2)-O(12)#4 | 85.0(2)    |
| O(9)#13-K(1)-O(2)#10 | 71.2(2)   | O(12)#4-Rb(2)-O(8)#12 | 88.2(2)    |
| O(9)#14-K(1)-O(2)    | 71.2(2)   | O(12)#4-Rb(2)-O(1)#2  | 119.5(2)   |
| O(9)#14-K(1)-O(1)#8  | 92.4(2)   | O(12)#4-Rb(2)-O(12)   | 113.78(15) |
| O(9)#13-K(1)-O(1)#3  | 92.4(2)   | O(1)-Mo(1)-O(3)       | 101.7(3)   |
| O(9)#14-K(1)-O(1)#3  | 82.8(2)   | O(1)-Mo(1)-O(4)       | 103.8(3)   |
| O(9)#13-K(1)-O(1)#8  | 82.8(2)   | O(1)-Mo(1)-O(5)       | 169.8(3)   |
| O(10)#4-K(2)-O(8)#12 | 95.44(18) | O(1)-Mo(1)-O(6)#3     | 83.8(3)    |
| O(10)#4-K(2)-O(11)#7 | 131.0(2)  | O(2)-Mo(1)-O(1)       | 103.4(4)   |
| O(10)#4-K(2)-O(1)#2  | 86.6(2)   | O(2)-Mo(1)-O(3)       | 100.5(3)   |
| O(10)#4-K(2)-O(12)#4 | 54.3(2)   | O(2)-Mo(1)-O(4)       | 101.6(3)   |
| O(11)-K(2)-O(10)#4   | 99.7(2)   | O(2)-Mo(1)-O(5)       | 85.4(3)    |
| O(11)#7-K(2)-O(8)#12 | 52.91(19) | O(2)-Mo(1)-O(6)#3     | 172.7(3)   |
| O(11)-K(2)-O(8)#12   | 146.1(2)  | O(3)-Mo(1)-O(4)       | 141.1(3)   |
| O(11)-K(2)-O(11)#7   | 95.15(18) | O(3)-Mo(1)-O(5)       | 81.5(3)    |
| O(11)#7-K(2)-O(1)#2  | 141.4(2)  | O(3)-Mo(1)-O(6)#3     | 78.6(2)    |
| O(11)-K(2)-O(1)#2    | 65.9(2)   | O(4)-Mo(1)-O(5)       | 68.9(2)    |
| O(11)-K(2)-O(12)#4   | 76.7(2)   | O(4)-Mo(1)-O(6)#3     | 75.5(3)    |
| O(11)#7-K(2)-O(12)#4 | 85.0(2)   | O(4)-Mo(2)-O(5)       | 72.6(3)    |
| O(9)#12-K(2)-O(10)#4 | 114.5(2)  | O(4)-Mo(2)-O(10)      | 149.9(3)   |
| O(9)#12-K(2)-O(8)#12 | 55.21(18) | O(4)-Mo(2)-O(8)#3     | 87.7(3)    |
| O(9)#12-K(2)-O(11)   | 138.8(2)  | O(5)-Mo(2)-O(8)#3     | 73.1(2)    |
| O(9)#12-K(2)-O(11)#7 | 79.9(2)   | O(10)-Mo(2)-O(5)      | 81.0(3)    |

|                      |            |                      |          |
|----------------------|------------|----------------------|----------|
| O(9)#12-K(2)-O(1)#2  | 92.8(2)    | O(10)-Mo(2)-O(8)#3   | 70.8(3)  |
| O(9)#12-K(2)-O(12)#4 | 142.2(2)   | O(11)-Mo(2)-O(4)     | 99.7(3)  |
| O(1)#9-Rb(1)-O(4)#9  | 53.46(17)  | O(11)-Mo(2)-O(5)     | 157.9(3) |
| O(1)#8-Rb(1)-O(4)#8  | 53.46(17)  | O(11)-Mo(2)-O(10)    | 99.6(3)  |
| O(1)#8-Rb(1)-O(4)#9  | 63.63(19)  | O(11)-Mo(2)-O(8)#3   | 86.1(3)  |
| O(1)#9-Rb(1)-O(4)#8  | 63.63(19)  | O(12)-Mo(2)-O(4)     | 101.8(3) |
| O(1)#9-Rb(1)-O(6)#11 | 49.86(18)  | O(12)-Mo(2)-O(5)     | 97.5(3)  |
| O(1)#9-Rb(1)-O(6)#10 | 107.24(19) | O(12)-Mo(2)-O(10)    | 95.5(3)  |
| O(1)#8-Rb(1)-O(6)#11 | 107.24(19) | O(12)-Mo(2)-O(8)#3   | 164.2(3) |
| O(1)#8-Rb(1)-O(6)#10 | 49.86(18)  | O(12)-Mo(2)-O(11)    | 104.4(4) |
| O(1)#9-Rb(1)-O(1)#8  | 106.0(3)   | O(6)#3-Mo(1)-O(5)    | 87.4(2)  |
| O(1)#8-Rb(1)-O(12)#2 | 88.88(19)  | O(8)-Mo(3)-O(8)#3    | 80.4(3)  |
| O(1)#9-Rb(1)-O(12)   | 88.88(19)  | O(9)-Mo(3)-O(8)      | 89.0(3)  |
| O(1)#9-Rb(1)-O(12)#2 | 129.0(2)   | O(9)#3-Mo(3)-O(8)    | 166.6(3) |
| O(1)#8-Rb(1)-O(12)   | 129.0(2)   | O(9)#3-Mo(3)-O(8)#3  | 89.0(3)  |
| O(2)-Rb(1)-O(4)#9    | 136.44(18) | O(9)-Mo(3)-O(8)#3    | 166.6(3) |
| O(2)#2-Rb(1)-O(4)#8  | 136.44(18) | O(9)#3-Mo(3)-O(9)    | 102.6(5) |
| O(2)#2-Rb(1)-O(4)#9  | 114.21(19) | O(9)-Mo(3)-O(10)     | 98.1(3)  |
| O(2)-Rb(1)-O(4)#8    | 114.21(19) | O(9)-Mo(3)-O(10)#3   | 103.0(3) |
| O(2)-Rb(1)-O(6)#11   | 139.07(18) | O(9)#3-Mo(3)-O(10)   | 103.0(3) |
| O(2)#2-Rb(1)-O(6)#10 | 139.07(18) | O(9)#3-Mo(3)-O(10)#3 | 98.1(3)  |
| O(2)-Rb(1)-O(6)#10   | 67.95(19)  | O(10)-Mo(3)-O(8)     | 81.7(3)  |
| O(2)#2-Rb(1)-O(6)#11 | 67.95(19)  | O(10)#3-Mo(3)-O(8)   | 72.4(3)  |
| O(2)-Rb(1)-O(2)#2    | 97.8(3)    | O(10)-Mo(3)-O(8)#3   | 72.4(3)  |
| O(2)#2-Rb(1)-O(1)#9  | 79.1(2)    | O(10)#3-Mo(3)-O(10)  | 146.0(4) |
| O(2)#2-Rb(1)-O(1)#8  | 168.69(18) | O(10)#3-Mo(3)-O(8)#3 | 81.7(3)  |
| O(2)-Rb(1)-O(1)#8    | 79.1(2)    | O(5)-P(1)-O(7)       | 107.6(3) |
| O(2)-Rb(1)-O(1)#9    | 168.69(18) | O(8)-P(1)-O(5)       | 112.5(4) |
| O(2)-Rb(1)-O(12)#2   | 60.3(2)    | O(8)-P(1)-O(7)       | 101.5(4) |
| O(2)#2-Rb(1)-O(12)#2 | 80.2(2)    | O(6)-P(1)-O(5)       | 110.8(4) |
| O(2)#2-Rb(1)-O(12)   | 60.3(2)    | O(6)-P(1)-O(8)       | 113.2(4) |
| O(2)-Rb(1)-O(12)     | 80.2(2)    | O(6)-P(1)-O(7)       | 110.8(4) |
| O(4)#8-Rb(1)-O(4)#9  | 60.6(2)    |                      |          |

Symmetry transformations used to generate equivalent atoms:

|                        |                           |                           |
|------------------------|---------------------------|---------------------------|
| #1 $x+1,y,z$           | #2 $x,-y+1,-z+1$          | #3 $-x+1,y,-z+1/2$        |
| #4 $x+1/2,-y+1/2,-z+1$ | #5 $-x+1/2,-y+1/2,z-1/2$  | #6 $x+1/2,y-1/2,z$        |
| #7 $x-1/2,-y+1/2,-z+1$ | #8 $x-1,y,z$              | #9 $x-1,-y+1,-z+1$        |
| #10 $-x,y,-z+1/2$      | #11 $-x,-y+1,z+1/2$       | #12 $-x+1/2,-y+1/2,z+1/2$ |
| #13 $x-1/2,y+1/2,z$    | #14 $-x+1/2,y+1/2,-z+1/2$ | #15 $-x,-y+1,z-1/2$       |



Table S5. Selected bond lengths (Å) and angles (°) for NaRb<sub>3</sub>Mo<sub>5</sub>P<sub>2</sub>O<sub>22</sub>.

|                      |           |                       |           |
|----------------------|-----------|-----------------------|-----------|
| Na(1)-O(1)#2         | 2.587(11) | Rb(2)-O(11)#11        | 3.453(10) |
| Na(1)-O(1)#4         | 2.587(11) | Mo(1)-O(2)            | 1.921(10) |
| Na(1)-O(7)           | 2.902(11) | Mo(1)-O(3)#12         | 2.347(9)  |
| Na(1)-O(7)#3         | 2.902(11) | Mo(1)-O(4)            | 1.686(10) |
| Na(1)-O(11)          | 2.490(10) | Mo(1)-O(5)            | 1.699(10) |
| Na(1)-O(11)#3        | 2.490(10) | Mo(1)-O(6)            | 1.912(8)  |
| Rb(1)-O(1)#7         | 2.804(10) | Mo(1)-O(10)           | 2.244(9)  |
| Rb(1)-O(2)#5         | 2.861(9)  | Mo(2)-O(6)            | 1.898(9)  |
| Rb(1)-O(3)#8         | 3.264(9)  | Mo(2)-O(7)            | 1.681(10) |
| Rb(1)-O(4)           | 2.818(10) | Mo(2)-O(8)            | 1.686(10) |
| Rb(1)-O(4)#7         | 2.929(11) | Mo(2)-O(10)           | 2.423(9)  |
| Rb(1)-O(5)           | 3.497(11) | Mo(2)-O(11)#12        | 2.378(9)  |
| Rb(1)-O(5)#5         | 3.031(11) | Mo(2)-O(12)           | 1.894(3)  |
| Rb(1)-O(7)#6         | 3.509(11) | Mo(3)-O(1)            | 1.689(10) |
| Rb(1)-O(8)#6         | 2.994(10) | Mo(3)-O(1)#12         | 1.689(10) |
| Rb(2)-O(5)           | 3.191(11) | Mo(3)-O(2)            | 1.921(9)  |
| Rb(2)-O(5)#6         | 3.191(10) | Mo(3)-O(2)#12         | 1.921(9)  |
| Rb(2)-O(6)#9         | 3.163(10) | Mo(3)-O(3)#12         | 2.333(9)  |
| Rb(2)-O(6)#10        | 3.163(10) | Mo(3)-O(3)            | 2.333(9)  |
| Rb(2)-O(7)           | 3.143(11) | P(1)-O(3)             | 1.509(9)  |
| Rb(2)-O(7)#6         | 3.144(11) | P(1)-O(9)             | 1.595(6)  |
| Rb(2)-O(8)#9         | 3.180(11) | P(1)-O(10)            | 1.526(9)  |
| Rb(2)-O(8)#10        | 3.180(11) | P(1)-O(11)            | 1.500(10) |
| Rb(2)-O(11)#3        | 3.453(10) |                       |           |
| O(1)#4-Na(1)-O(1)#2  | 60.8(5)   | O(7)-Rb(2)-O(6)#9     | 138.2(2)  |
| O(1)#2-Na(1)-O(7)    | 67.3(3)   | O(7)#6-Rb(2)-O(6)#9   | 111.8(3)  |
| O(1)#4-Na(1)-O(7)    | 123.3(3)  | O(7)-Rb(2)-O(6)#10    | 111.8(3)  |
| O(1)#2-Na(1)-O(7)#3  | 123.3(3)  | O(7)-Rb(2)-O(7)#6     | 98.4(4)   |
| O(1)#4-Na(1)-O(7)#3  | 67.3(3)   | O(7)#6-Rb(2)-O(8)#9   | 78.0(3)   |
| O(7)-Na(1)-O(7)#3    | 169.2(5)  | O(7)#6-Rb(2)-O(8)#10  | 168.4(2)  |
| O(11)-Na(1)-O(1)#4   | 138.3(3)  | O(7)-Rb(2)-O(8)#9     | 168.4(2)  |
| O(11)#3-Na(1)-O(1)#2 | 138.3(3)  | O(7)-Rb(2)-O(8)#10    | 78.0(3)   |
| O(11)-Na(1)-O(1)#2   | 122.7(3)  | O(7)-Rb(2)-O(11)#11   | 140.0(2)  |
| O(11)#3-Na(1)-O(1)#4 | 122.7(3)  | O(7)#6-Rb(2)-O(11)#3  | 140.0(2)  |
| O(11)#3-Na(1)-O(7)#3 | 88.7(3)   | O(7)#6-Rb(2)-O(11)#11 | 65.8(3)   |
| O(11)-Na(1)-O(7)#3   | 83.2(3)   | O(7)-Rb(2)-O(11)#3    | 65.8(3)   |
| O(11)-Na(1)-O(7)     | 88.7(3)   | O(8)#9-Rb(2)-O(5)     | 90.8(2)   |
| O(11)#3-Na(1)-O(7)   | 83.2(3)   | O(8)#10-Rb(2)-O(5)#6  | 90.8(2)   |
| O(11)-Na(1)-O(11)#3  | 83.5(5)   | O(8)#9-Rb(2)-O(5)#6   | 127.7(3)  |
| O(1)#7-Rb(1)-O(2)#5  | 114.3(3)  | O(8)#10-Rb(2)-O(5)    | 127.7(3)  |
| O(1)#7-Rb(1)-O(3)#8  | 56.1(3)   | O(8)#9-Rb(2)-O(8)#10  | 107.6(4)  |
| O(1)#7-Rb(1)-O(4)    | 138.9(3)  | O(8)#10-Rb(2)-O(11)#3 | 48.5(2)   |
| O(1)#7-Rb(1)-O(4)#7  | 80.8(3)   | O(8)#9-Rb(2)-O(11)#11 | 48.5(2)   |

|                       |            |                        |          |
|-----------------------|------------|------------------------|----------|
| O(1)#7-Rb(1)-O(5)     | 92.9(3)    | O(8)#9-Rb(2)-O(11)#3   | 109.9(3) |
| O(1)#7-Rb(1)-O(5)#5   | 144.0(3)   | O(8)#10-Rb(2)-O(11)#11 | 109.9(3) |
| O(1)#7-Rb(1)-O(7)#6   | 56.5(3)    | O(11)#11-Rb(2)-O(11)#3 | 148.4(3) |
| O(1)#7-Rb(1)-O(8)#6   | 91.8(3)    | O(2)-Mo(1)-O(3)#12     | 71.5(3)  |
| O(2)#5-Rb(1)-O(3)#8   | 96.9(2)    | O(2)-Mo(1)-O(10)       | 81.3(3)  |
| O(2)#5-Rb(1)-O(4)#7   | 133.4(3)   | O(4)-Mo(1)-O(2)        | 100.0(4) |
| O(2)#5-Rb(1)-O(5)#5   | 54.5(3)    | O(4)-Mo(1)-O(3)#12     | 86.5(4)  |
| O(2)#5-Rb(1)-O(5)     | 146.6(3)   | O(4)-Mo(1)-O(5)        | 105.9(5) |
| O(2)#5-Rb(1)-O(7)#6   | 124.6(3)   | O(4)-Mo(1)-O(6)        | 98.3(5)  |
| O(2)#5-Rb(1)-O(8)#6   | 82.6(3)    | O(4)-Mo(1)-O(10)       | 158.7(4) |
| O(3)#8-Rb(1)-O(5)     | 114.8(2)   | O(5)-Mo(1)-O(2)        | 96.3(4)  |
| O(3)#8-Rb(1)-O(7)#6   | 110.5(2)   | O(5)-Mo(1)-O(3)#12     | 164.2(4) |
| O(4)-Rb(1)-O(2)#5     | 98.4(3)    | O(5)-Mo(1)-O(6)        | 101.5(4) |
| O(4)-Rb(1)-O(3)#8     | 146.1(3)   | O(5)-Mo(1)-O(10)       | 95.0(4)  |
| O(4)#7-Rb(1)-O(3)#8   | 53.5(2)    | O(6)-Mo(1)-O(2)        | 149.8(4) |
| O(4)-Rb(1)-O(4)#7     | 94.8(2)    | O(6)-Mo(1)-O(3)#12     | 85.9(4)  |
| O(4)-Rb(1)-O(5)       | 49.2(3)    | O(6)-Mo(1)-O(10)       | 73.0(4)  |
| O(4)-Rb(1)-O(5)#5     | 75.5(3)    | O(10)-Mo(1)-O(3)#12    | 73.7(3)  |
| O(4)#7-Rb(1)-O(5)#5   | 86.7(3)    | O(6)-Mo(2)-O(10)       | 69.1(3)  |
| O(4)#7-Rb(1)-O(5)     | 67.1(3)    | O(6)-Mo(2)-O(11)#12    | 75.4(4)  |
| O(4)#7-Rb(1)-O(7)#6   | 101.0(3)   | O(7)-Mo(2)-O(6)        | 102.3(5) |
| O(4)-Rb(1)-O(7)#6     | 84.8(3)    | O(7)-Mo(2)-O(8)        | 104.7(5) |
| O(4)-Rb(1)-O(8)#6     | 67.5(3)    | O(7)-Mo(2)-O(10)       | 83.4(4)  |
| O(4)#7-Rb(1)-O(8)#6   | 143.1(3)   | O(7)-Mo(2)-O(11)#12    | 172.4(4) |
| O(5)#5-Rb(1)-O(3)#8   | 89.5(3)    | O(7)-Mo(2)-O(12)       | 100.4(4) |
| O(5)#5-Rb(1)-O(5)     | 113.09(17) | O(8)-Mo(2)-O(6)        | 102.5(5) |
| O(5)#5-Rb(1)-O(7)#6   | 159.5(3)   | O(8)-Mo(2)-O(10)       | 169.7(4) |
| O(5)-Rb(1)-O(7)#6     | 54.8(2)    | O(8)-Mo(2)-O(11)#12    | 82.8(4)  |
| O(8)#6-Rb(1)-O(3)#8   | 144.7(3)   | O(8)-Mo(2)-O(12)       | 103.1(4) |
| O(8)#6-Rb(1)-O(5)#5   | 117.1(3)   | O(11)#12-Mo(2)-O(10)   | 89.1(3)  |
| O(8)#6-Rb(1)-O(5)     | 77.4(3)    | O(12)-Mo(2)-O(6)       | 140.0(4) |
| O(8)#6-Rb(1)-O(7)#6   | 47.6(3)    | O(12)-Mo(2)-O(10)      | 81.3(3)  |
| O(5)-Rb(2)-O(5)#6     | 116.1(4)   | O(12)-Mo(2)-O(11)#12   | 77.8(3)  |
| O(5)-Rb(2)-O(11)#3    | 79.2(2)    | O(1)#12-Mo(3)-O(1)     | 101.6(7) |
| O(5)#6-Rb(2)-O(11)#3  | 118.4(2)   | O(1)-Mo(3)-O(2)#12     | 98.6(4)  |
| O(5)-Rb(2)-O(11)#11   | 118.4(2)   | O(1)#12-Mo(3)-O(2)#12  | 103.3(4) |
| O(5)#6-Rb(2)-O(11)#11 | 79.2(2)    | O(1)#12-Mo(3)-O(2)     | 98.6(4)  |
| O(6)#9-Rb(2)-O(5)#6   | 96.7(3)    | O(1)-Mo(3)-O(2)        | 103.3(4) |
| O(6)#10-Rb(2)-O(5)#6  | 141.9(2)   | O(1)-Mo(3)-O(3)        | 166.5(4) |
| O(6)#10-Rb(2)-O(5)    | 96.7(3)    | O(1)#12-Mo(3)-O(3)     | 90.1(4)  |
| O(6)#9-Rb(2)-O(5)     | 141.9(2)   | O(1)#12-Mo(3)-O(3)#12  | 166.5(4) |
| O(6)#9-Rb(2)-O(6)#10  | 62.6(3)    | O(1)-Mo(3)-O(3)#12     | 90.1(4)  |
| O(6)#10-Rb(2)-O(8)#9  | 66.5(3)    | O(2)#12-Mo(3)-O(2)     | 145.1(5) |
| O(6)#10-Rb(2)-O(8)#10 | 52.3(2)    | O(2)#12-Mo(3)-O(3)#12  | 81.3(3)  |

|                        |          |                    |          |
|------------------------|----------|--------------------|----------|
| O(6)#9-Rb(2)-O(8)#9    | 52.3(2)  | O(2)-Mo(3)-O(3)#12 | 71.8(3)  |
| O(6)#9-Rb(2)-O(8)#10   | 66.5(3)  | O(2)#12-Mo(3)-O(3) | 71.8(3)  |
| O(6)#9-Rb(2)-O(11)#11  | 46.8(2)  | O(2)-Mo(3)-O(3)    | 81.3(3)  |
| O(6)#9-Rb(2)-O(11)#3   | 102.6(2) | O(3)#12-Mo(3)-O(3) | 79.1(5)  |
| O(6)#10-Rb(2)-O(11)#11 | 102.6(2) | O(3)-P(1)-O(9)     | 101.5(5) |
| O(6)#10-Rb(2)-O(11)#3  | 46.8(2)  | O(3)-P(1)-O(10)    | 112.4(5) |
| O(7)-Rb(2)-O(5)#6      | 61.2(3)  | O(10)-P(1)-O(9)    | 107.7(4) |
| O(7)#6-Rb(2)-O(5)      | 61.2(3)  | O(11)-P(1)-O(3)    | 114.5(5) |
| O(7)-Rb(2)-O(5)        | 77.9(3)  | O(11)-P(1)-O(9)    | 109.8(5) |
| O(7)#6-Rb(2)-O(5)#6    | 77.9(3)  | O(11)-P(1)-O(10)   | 110.5(6) |
| O(7)#6-Rb(2)-O(6)#10   | 138.2(2) |                    |          |

---

Symmetry transformations used to generate equivalent atoms:

|                            |                            |                             |
|----------------------------|----------------------------|-----------------------------|
| #1 $-x+2, -y+1, z-1/2$     | #2 $x+1/2, y+1/2, z$       | #3 $-x+2, y, -z+1/2$        |
| #4 $-x+3/2, y+1/2, -z+1/2$ | #5 $x-1/2, -y+1/2, -z+1$   | #6 $x, -y+1, -z+1$          |
| #7 $x+1/2, -y+1/2, -z+1$   | #8 $-x+3/2, -y+1/2, z+1/2$ | #9 $x+1, -y+1, -z+1$        |
| #10 $x+1, y, z$            | #11 $-x+2, -y+1, z+1/2$    | #12 $-x+1, y, -z+1/2$       |
| #13 $x-1, y, z$            | #14 $x-1/2, y-1/2, z$      | #15 $-x+3/2, -y+1/2, z-1/2$ |

Table S6. Dipole moments (debye) of MoO<sub>6</sub>, and PO<sub>4</sub> polyhedra in K<sub>4</sub>Mo<sub>5</sub>P<sub>2</sub>O<sub>22</sub>, KCs<sub>3</sub>Mo<sub>5</sub>P<sub>2</sub>O<sub>22</sub>, Rb<sub>4</sub>Mo<sub>5</sub>P<sub>2</sub>O<sub>22</sub> and Cs<sub>4</sub>Mo<sub>5</sub>P<sub>2</sub>O<sub>22</sub>.

|                                                                      | K <sub>4</sub> Mo <sub>5</sub> P <sub>2</sub> O <sub>22</sub> | KCs <sub>3</sub> Mo <sub>5</sub> P <sub>2</sub> O <sub>22</sub> | Rb <sub>4</sub> Mo <sub>5</sub> P <sub>2</sub> O <sub>22</sub> | Cs <sub>4</sub> Mo <sub>5</sub> P <sub>2</sub> O <sub>22</sub> |
|----------------------------------------------------------------------|---------------------------------------------------------------|-----------------------------------------------------------------|----------------------------------------------------------------|----------------------------------------------------------------|
| Mo(1)O <sub>6</sub>                                                  | 2.40                                                          | 2.05                                                            | 6.71                                                           | 6.50                                                           |
| Mo(2)O <sub>6</sub>                                                  | 3.17                                                          | 2.61                                                            | 6.19                                                           | 7.04                                                           |
| Mo(3)O <sub>6</sub>                                                  | 4.89                                                          | 2.85                                                            | 6.07                                                           | 7.23                                                           |
| P(1)O <sub>4</sub>                                                   | 2.90                                                          | 2.19                                                            | 2.89                                                           | 2.67                                                           |
| [Mo <sub>5</sub> P <sub>2</sub> O <sub>23</sub> ] <sup>6-</sup> ring | 3.11                                                          | 2.63                                                            | 8.96                                                           | 8.37                                                           |

Figure S1. TG-DSC curves of (a)  $K_4Mo_5P_2O_{22}$ , (b)  $K_2Rb_2Mo_5P_2O_{22}$ , (c)  $KCs_3Mo_5P_2O_{22}$ , and (d)  $NaRb_3Mo_5P_2O_{22}$ .

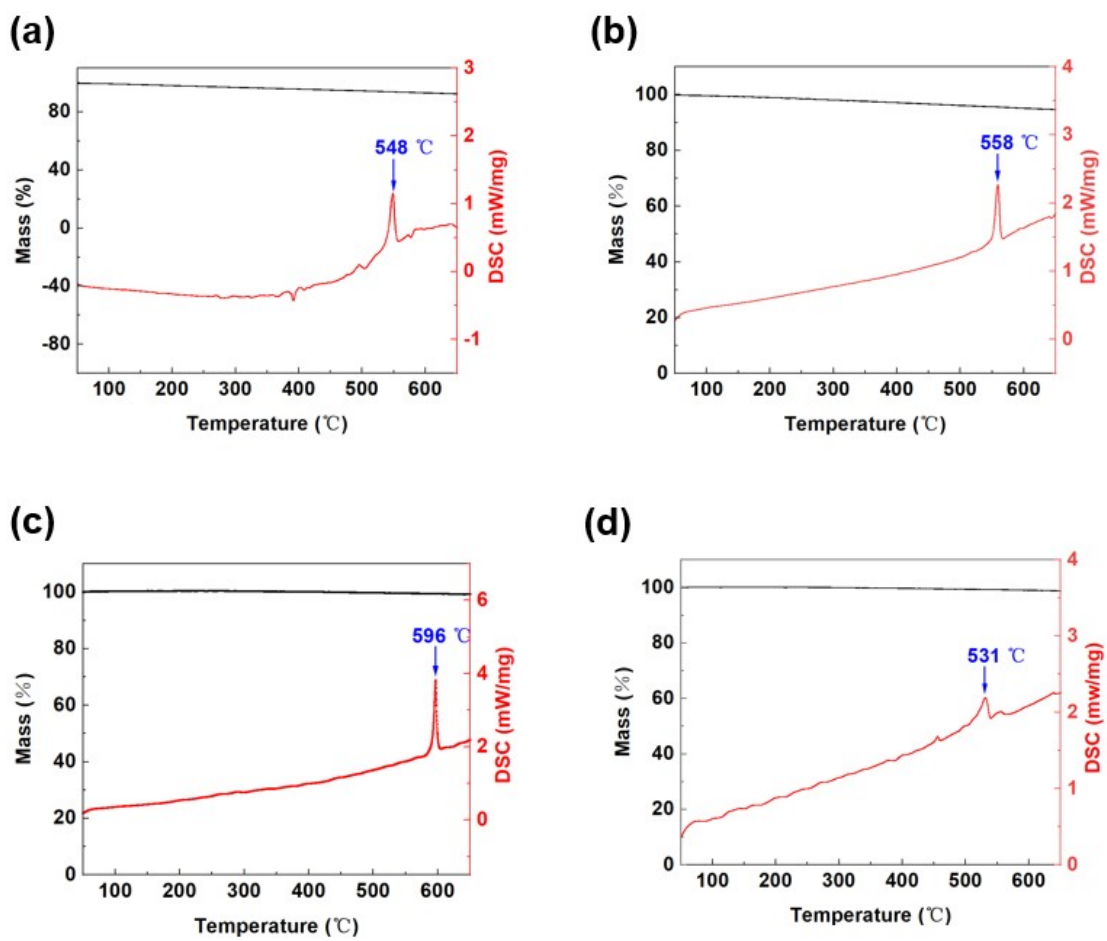

Figure S2. Calculated, experimental and after melting PXRD patterns for (a)  $K_4Mo_5P_2O_{22}$ , (b)  $K_2Rb_2Mo_5P_2O_{22}$ , (c)  $KCs_3Mo_5P_2O_{22}$ , and (d)  $NaRb_3Mo_5P_2O_{22}$ , (e) calculated PXRD comparison of  $K_4Mo_5P_2O_{22}$  with  $Cs_4Mo_5P_2O_{22}$  and  $Rb_4Mo_5P_2O_{22}$ .

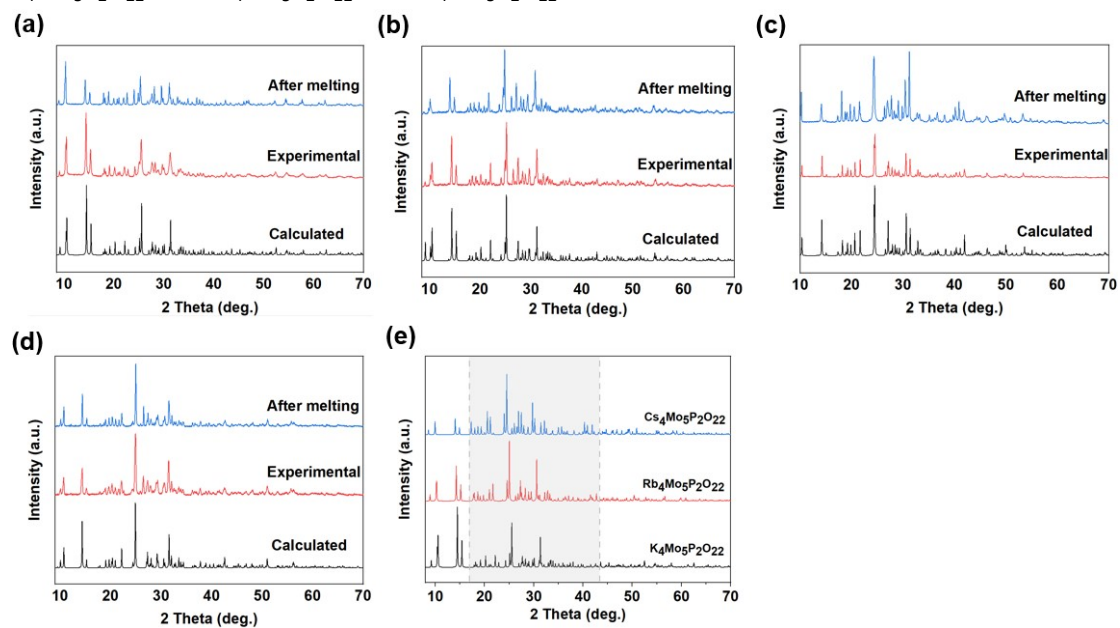

Figure S3. IR data for (a)  $K_4Mo_5P_2O_{22}$ , (b)  $K_2Rb_2Mo_5P_2O_{22}$ , (c)  $KCs_3Mo_5P_2O_{22}$ , and (d)  $NaRb_3Mo_5P_2O_{22}$ .

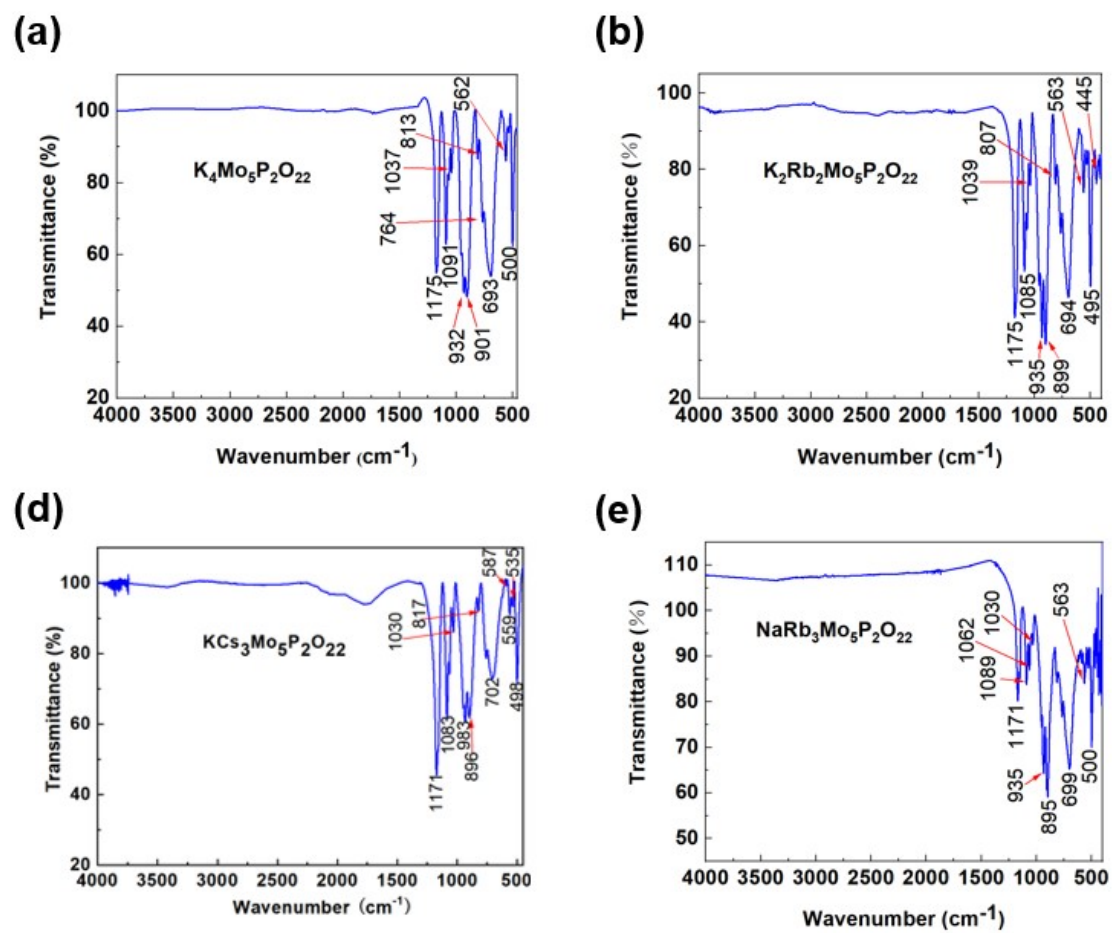

Figure S4. UV-Vis-NIR diffuse-reflectance spectra of (a)  $K_4Mo_5P_2O_{22}$ , (b)  $K_2Rb_2Mo_5P_2O_{22}$ , (c)  $KCs_3Mo_5P_2O_{22}$ , and (d)  $NaRb_3Mo_5P_2O_{22}$ .

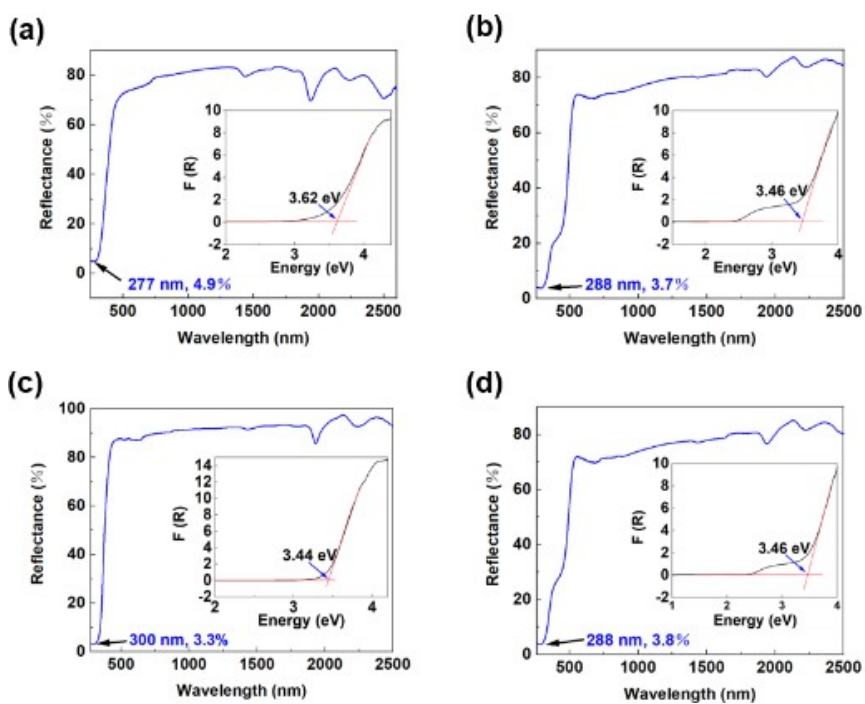



Figure S5. Oscilloscope traces of the SHG signals for the powders for KDP,  $K_4Mo_5P_2O_{22}$  (a), and (b)  $KCs_3Mo_5P_2O_{22}$  (at 1064 nm Q-switched Nd: YAG laser).

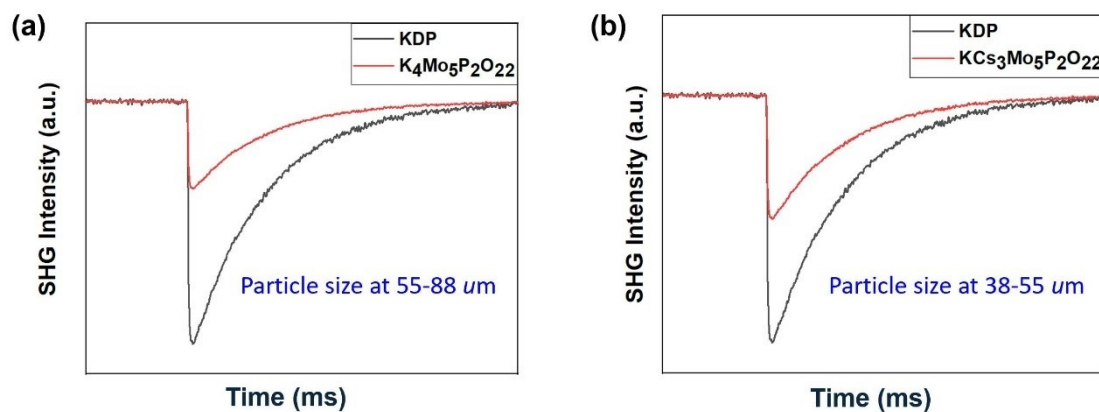

Figure S6. Dipole moment directions of the  $PO_4$  and  $MoO_6$  polyhedra in  $KCs_3Mo_5P_2O_{22}$ ,  $K_4Mo_5P_2O_{22}$ ,

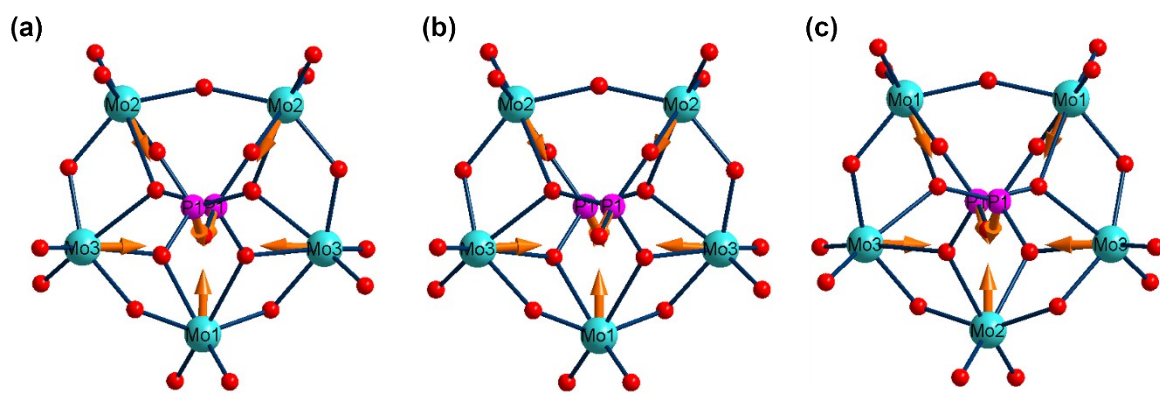

and  $\text{Cs}_4\text{Mo}_5\text{P}_2\text{O}_{22}$ . (The arrows represent the approximate directions of the dipole moments).

Figure S7. The SHG density maps of the VE occupied (left) and VE unoccupied orbitals (right) of  $\text{K}_4\text{Mo}_5\text{P}_2\text{O}_{22}$  (a-b),  $\text{NaRb}_3\text{Mo}_5\text{P}_2\text{O}_{22}$  (c-d).

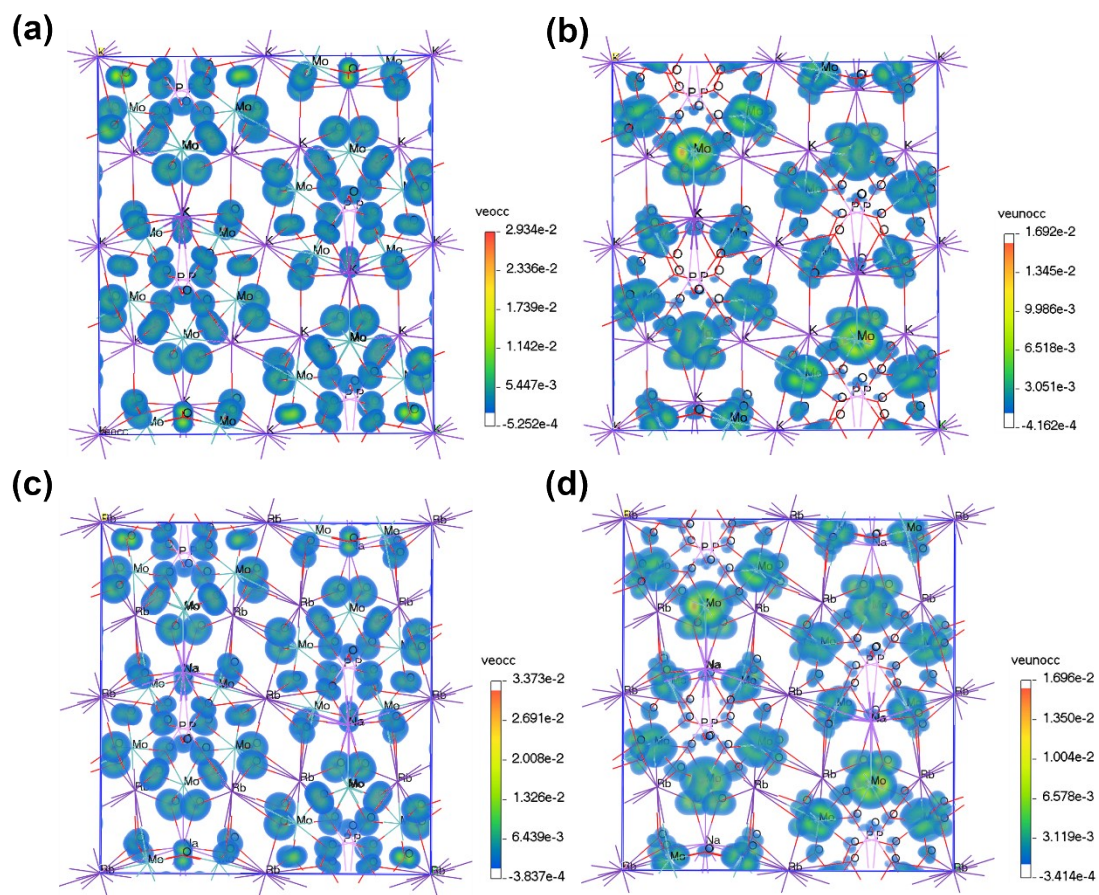

Figure 8. Calculated band structures of the GGA method, (a)  $K_4Mo_5P_2O_{22}$ , (b)  $KCs_3Mo_5P_2O_{22}$  and (c)  $NaRb_3Mo_5P_2O_{22}$ .

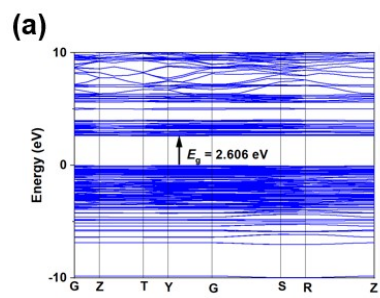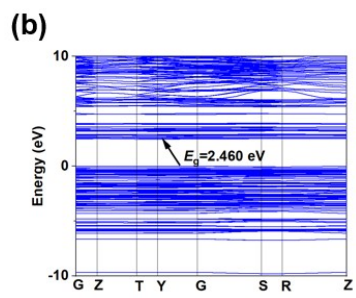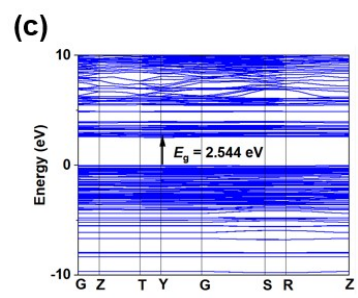

## References

- 1 V. Dolomanov, L. J. Bourhis, R. J. Gildea, J. A. K. Howard and H. Puschmann, *J. Appl. Crystallogr.*, 2009, **42**, 339.
- 2 G. M. Sheldrick, *Acta Crystallogr., Sect. A: Found. Crystallogr.*, 2008, **64**, 112.
- 3 A. L. Spek, *J. Appl. Crystallogr.*, 2003, **36**, 7.
- 4 P. Kubelka and F. Z. Munk, *Techn. Phys.*, 1931, **12**, 593.
- 5 S. K. Kurtz and T. T. Perry, *J. Appl. Phys.*, 1968, **39**, 3798.
- 6 S. J. Clark, M. D. Segall, C. J. Pickard, P. J. Hasnip, M. I. J. Probert, K. Refson and M. C. Payne, *Kristallogr. Cryst. Mater.*, 2005, **220**, 567.
- 7 B. G. Pfrommer, M. Côté, S. G. Louie and M. L. Cohen, *J. Comput. Phys.*, 1997, **131**, 233.
- 8 J. P. Perdew, K. Burke and M. Ernzerhof, *Phys. Rev. Lett.*, 1996, **77**, 3865.
- 9 A. M. Rappe, K. M. Rabe, E. Kaxiras and J. D. Joannopoulos, *Phys. Rev. B.*, 1990, **41**, 1227.
- 10 J. S. Lin, A. Qteish, M. C. Payne and V. Heine, *Phys. Rev. B.*, 1993, **47**, 4174.
